# Supplementary material
Source: publisher figshare collection journal article supplement (https://gsajournals.figshare.com/ndownloader/files/26488256)
Supplement: Supplementary file 1 [file 26488256]

**
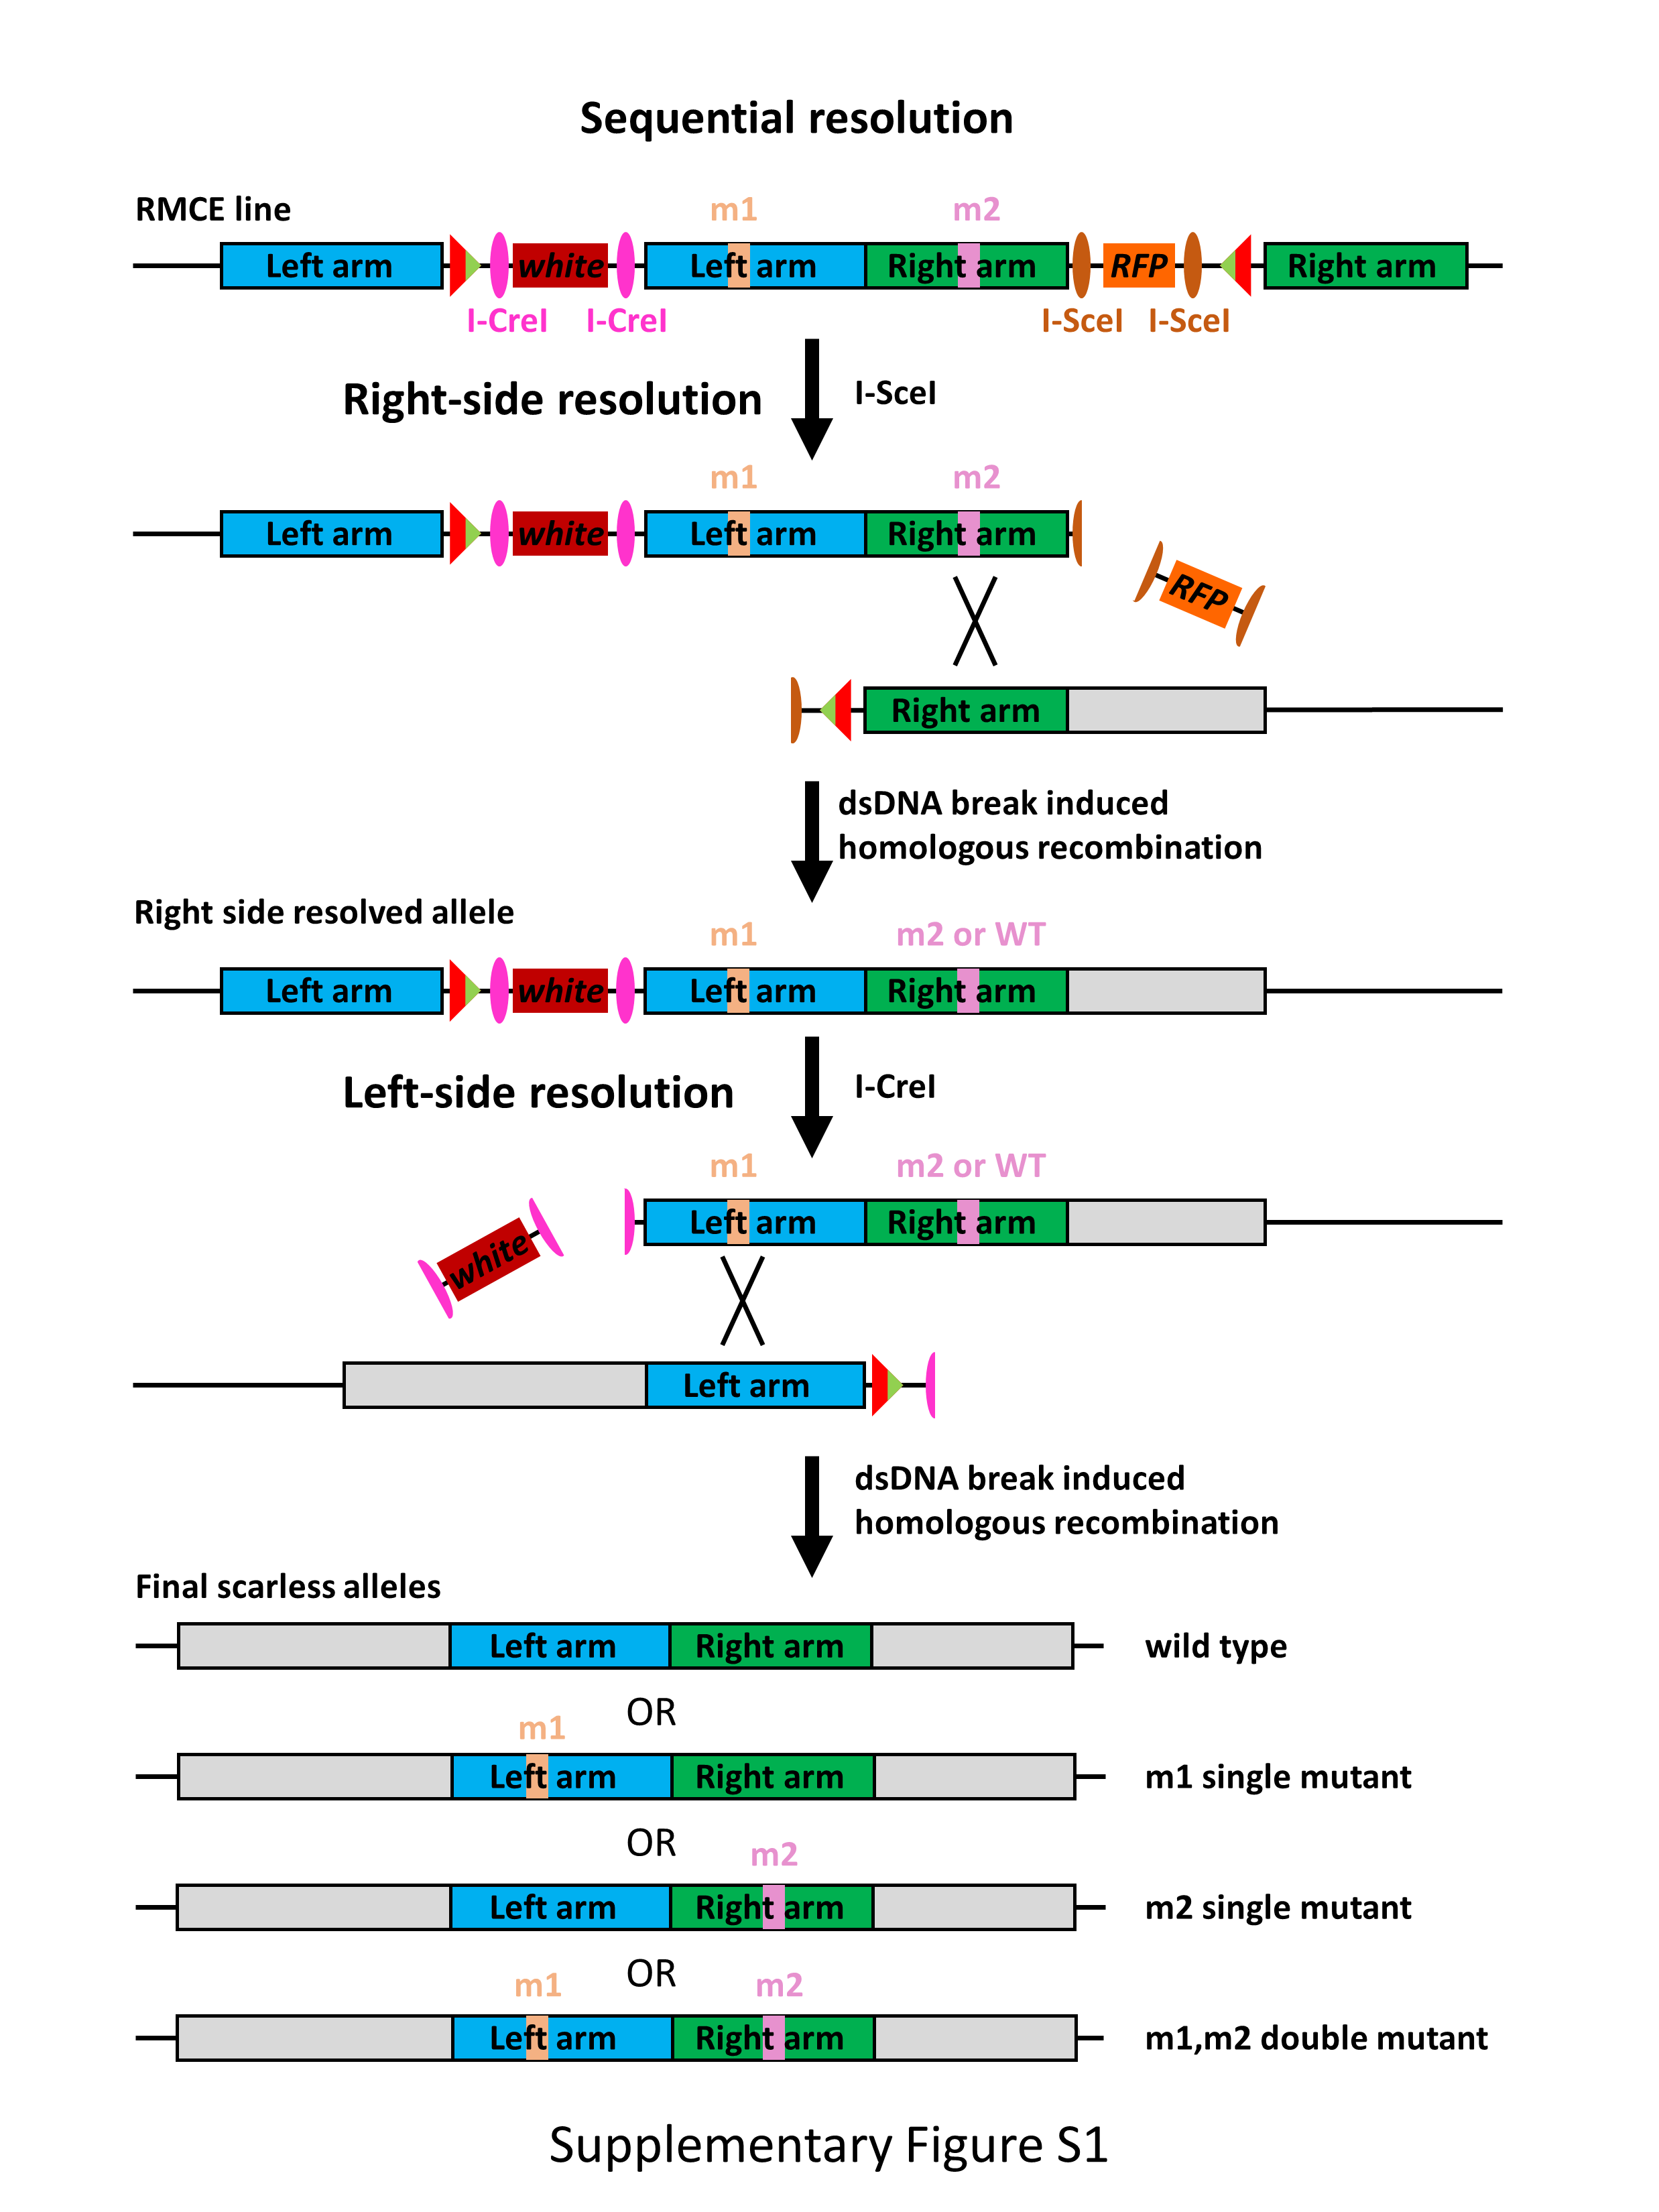
**

**Supplementary Figure S1. Sequential resolution of the RMCE line.**

Schematics showing sequential resolution of the RMCE allele. The right side is first resolved by I-SceI expression, followed by left-side resolution by the expression of I-CreI.


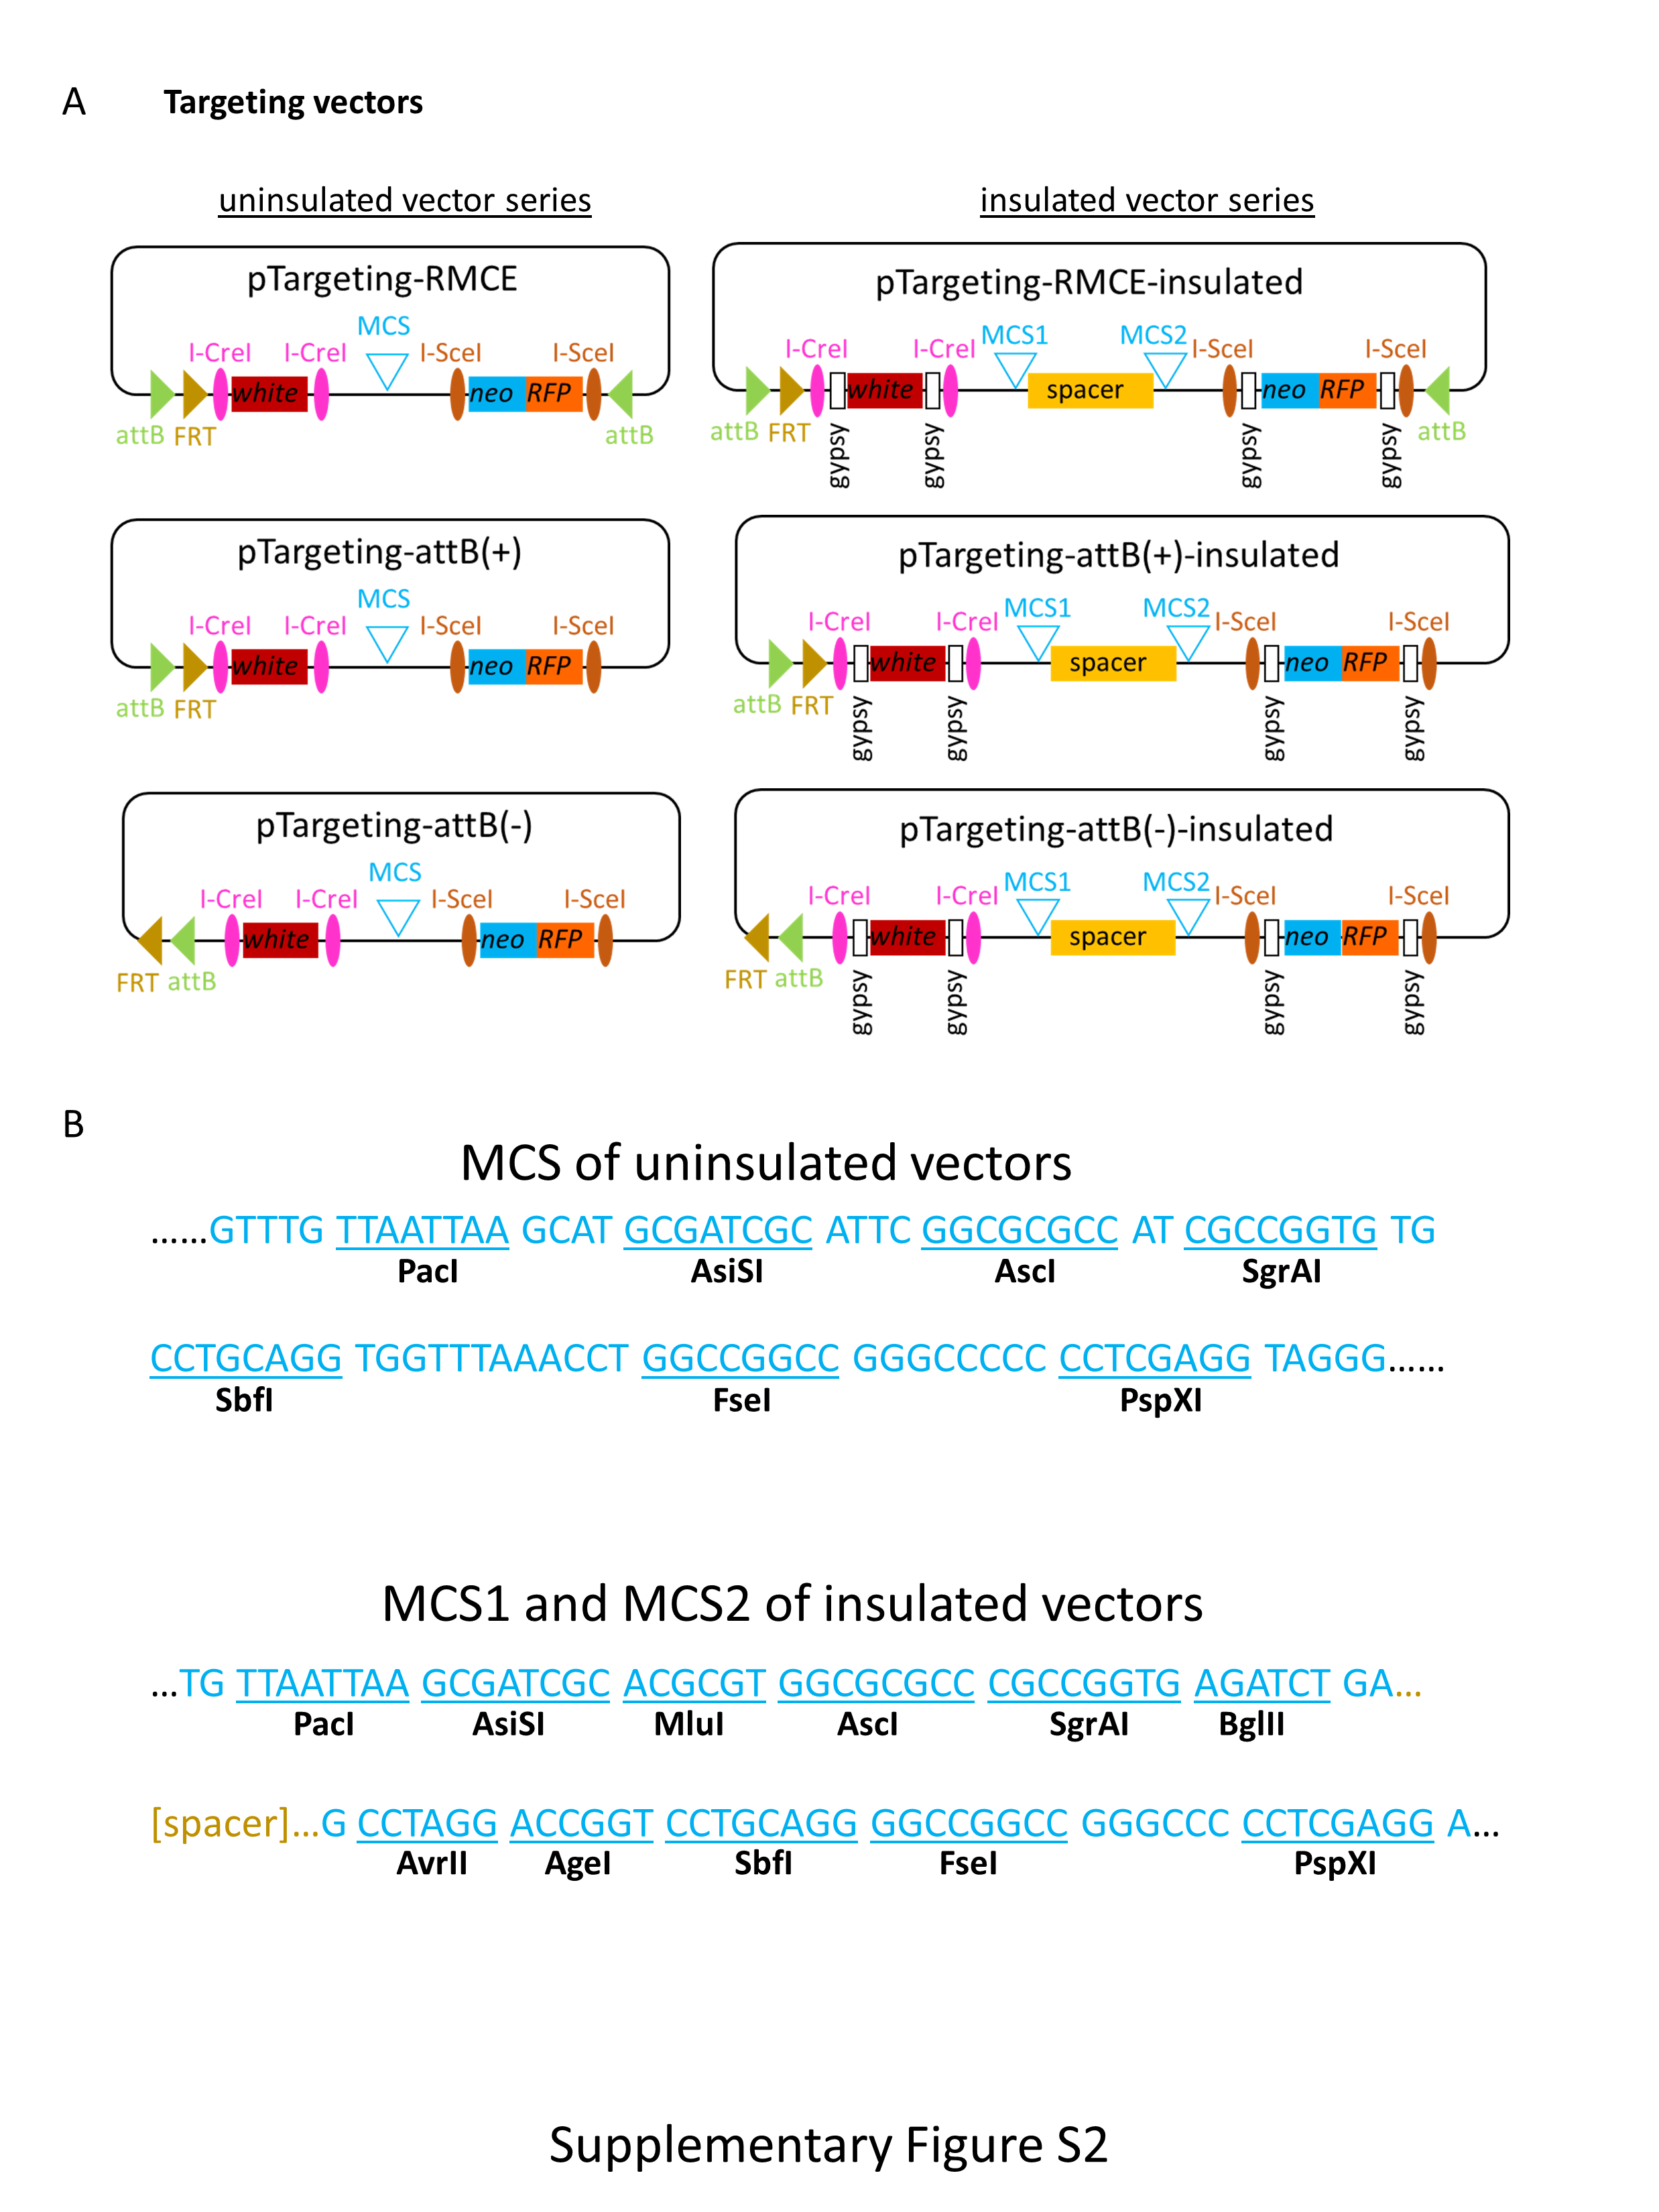


**Supplementary Figure S2. Targeting vectors**

**A.** Maps of targeting vectors. The RMCE vectors are for landing sites containing inverted attP cassette, and the attB vectors are for landing sites with a single attB (or FRT) site. The (+) and (-) versions differ in the orientations of the attB and FRT sites relative to the rest of the vector. The uninsulated series are suitable for loci where *mini-white* is known to be expressed, and the insulated series should be used in loci where *mini-white* is or might be silenced. One way to determine if *mini-white* is silenced in the locus of interest is to examine existing *mini-white* marked transposon insertions near the locus of interest. If all such transposons contain insulated *mini-white*, *mini-white* is likely to be silenced near this particular locus in the genome. See Materials and Methods for more details on the silencing of *mini-white*.

**B.** The multiple cloning site regions of the targeting vectors. Only unique restriction sites are indicated. For insulated vectors, the 2 kb spacer separates the two flanking insulators and reduces plasmid instability during cloning. One site from MCS1 and one from MCS2 should be selected when using the insulated vectors to remove the spacer.


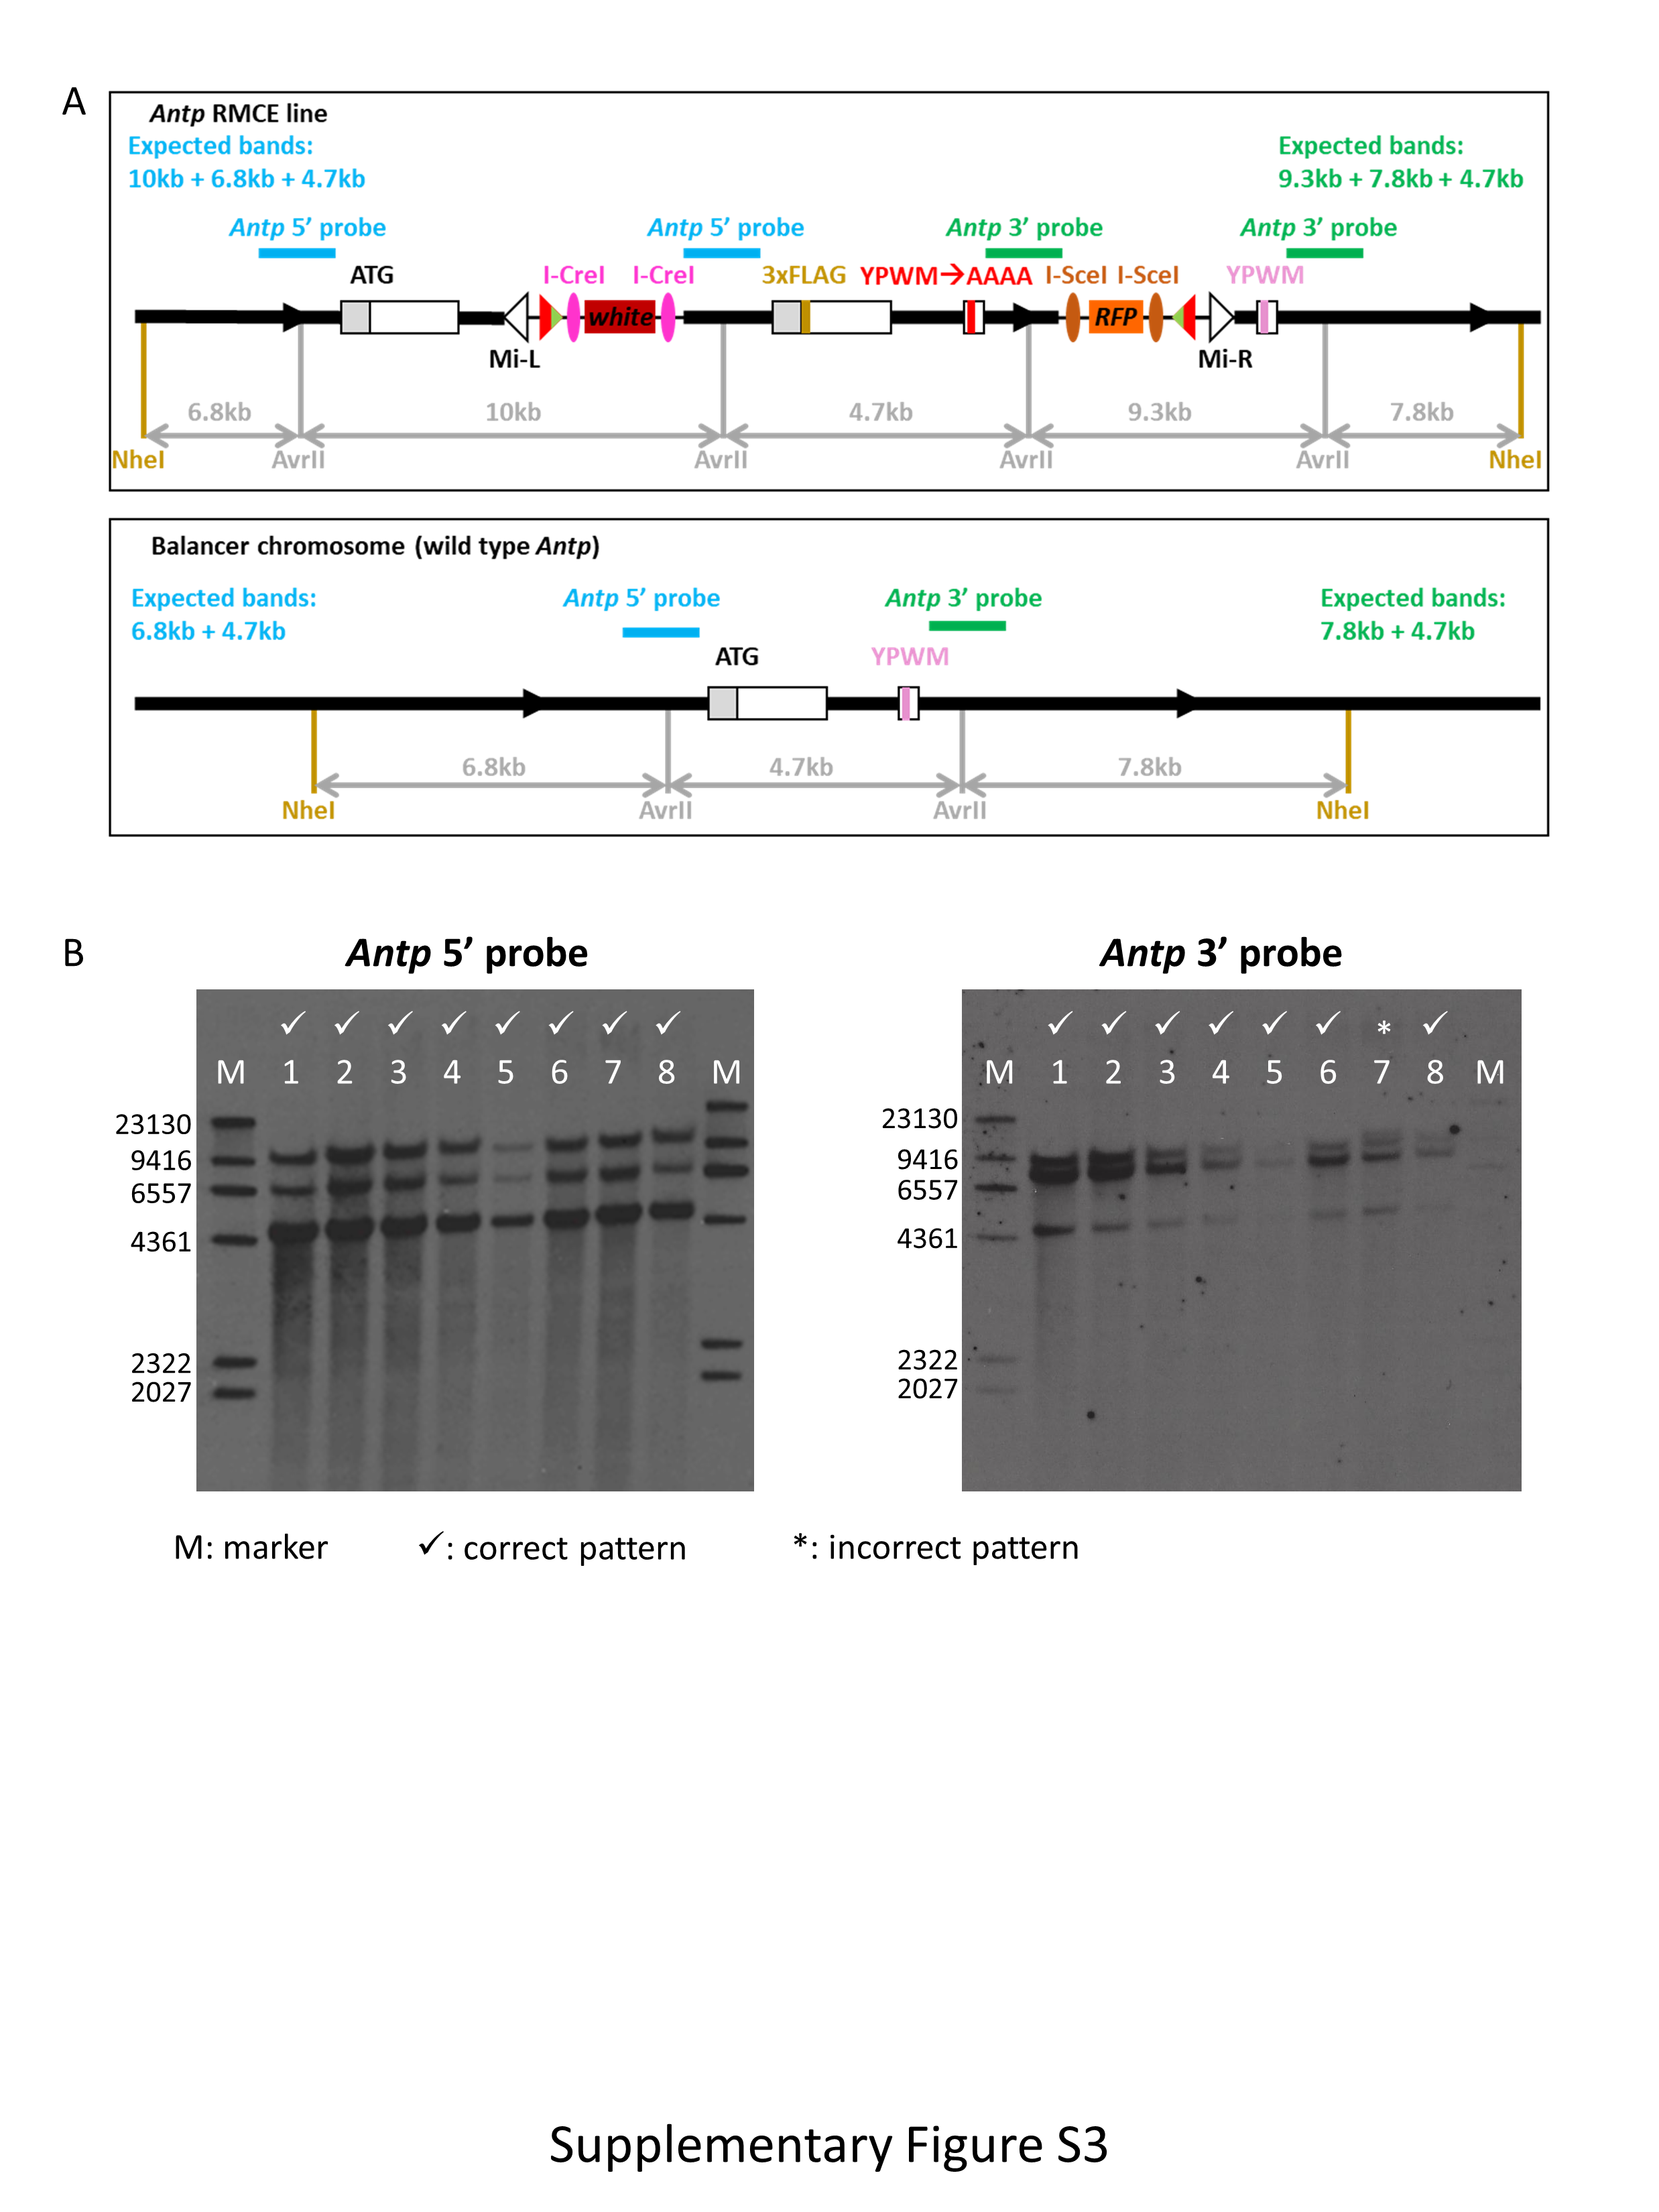


**Supplementary Figure S3. Southern blot verification of multiple independent *Antp* RMCE alleles.**

**A.** Restriction maps of the *Antp* RMCE allele and the wild type *Antp* allele (the balancer chromosome). The positions of relevant restriction sites and the sizes of all relevant restriction fragments are shown. The regions used as 5’ and 3’ Southern blot probes are indicated with blue and green bars. The expected Southern blot patterns for each probe are also shown. The schematics are not drawn to scale.

**B.** Southern blot results for 8 independent *Antp* RMCE alleles. The *Antp* RMCE alleles are homozygous lethal and are balanced with a balancer chromosome, which contributes to the observed Southern blot patterns. Sample 7 has an additional band above the 9.3 kb band when blotted with the *Antp* 3’ probe, indicating it might have additional rearrangement(s).


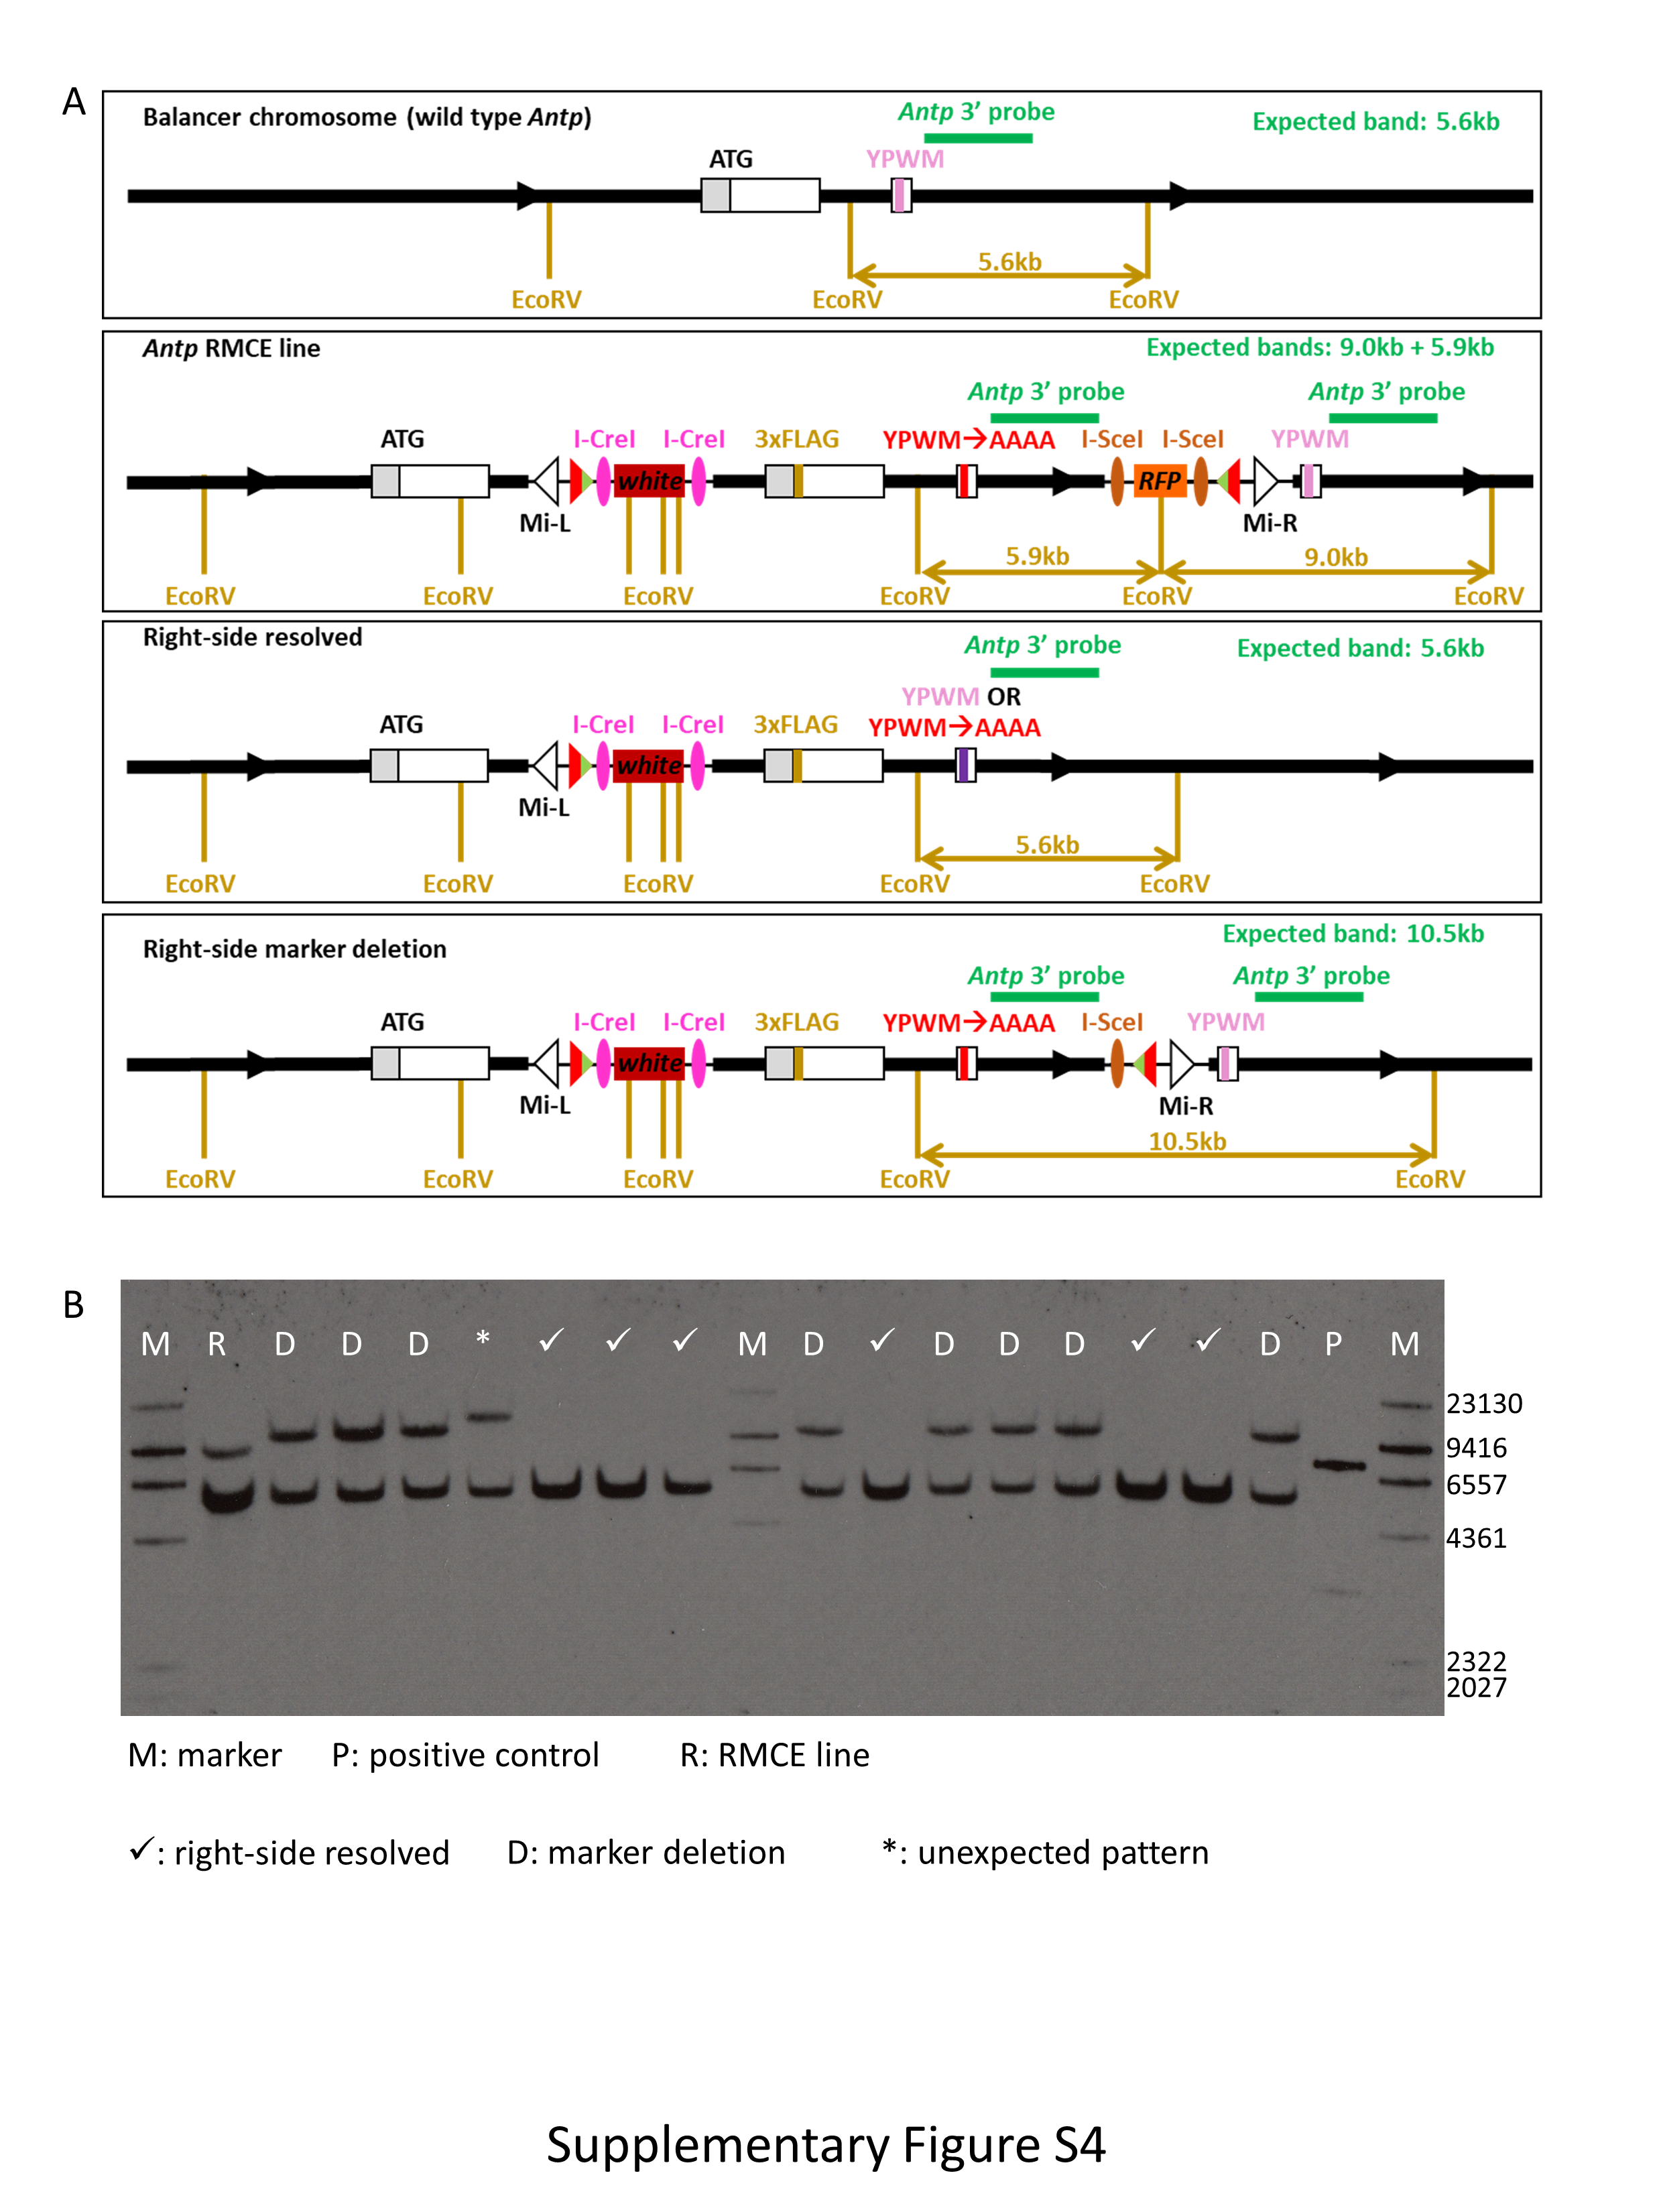


**Supplementary Figure S4. Southern blot analysis of alleles from I-SceI mediated right-side resolution.**

**A.** Restriction maps of various genotypes. The positions of relevant restriction sites and the lengths of relevant restriction fragments are indicated. The green bar indicates the region used as the *Antp* 3’ probe, and the expected Southern blot pattern for each genotype is also shown. The schematics are not drawn to scale.

**B.** Southern blot analysis of a subset of selected alleles. All alleles are homozygous lethal and are balanced with a balancer chromosome, which gives a 5.6 kb band. The positive control is restriction digested plasmid with a fragment from *Antp*.


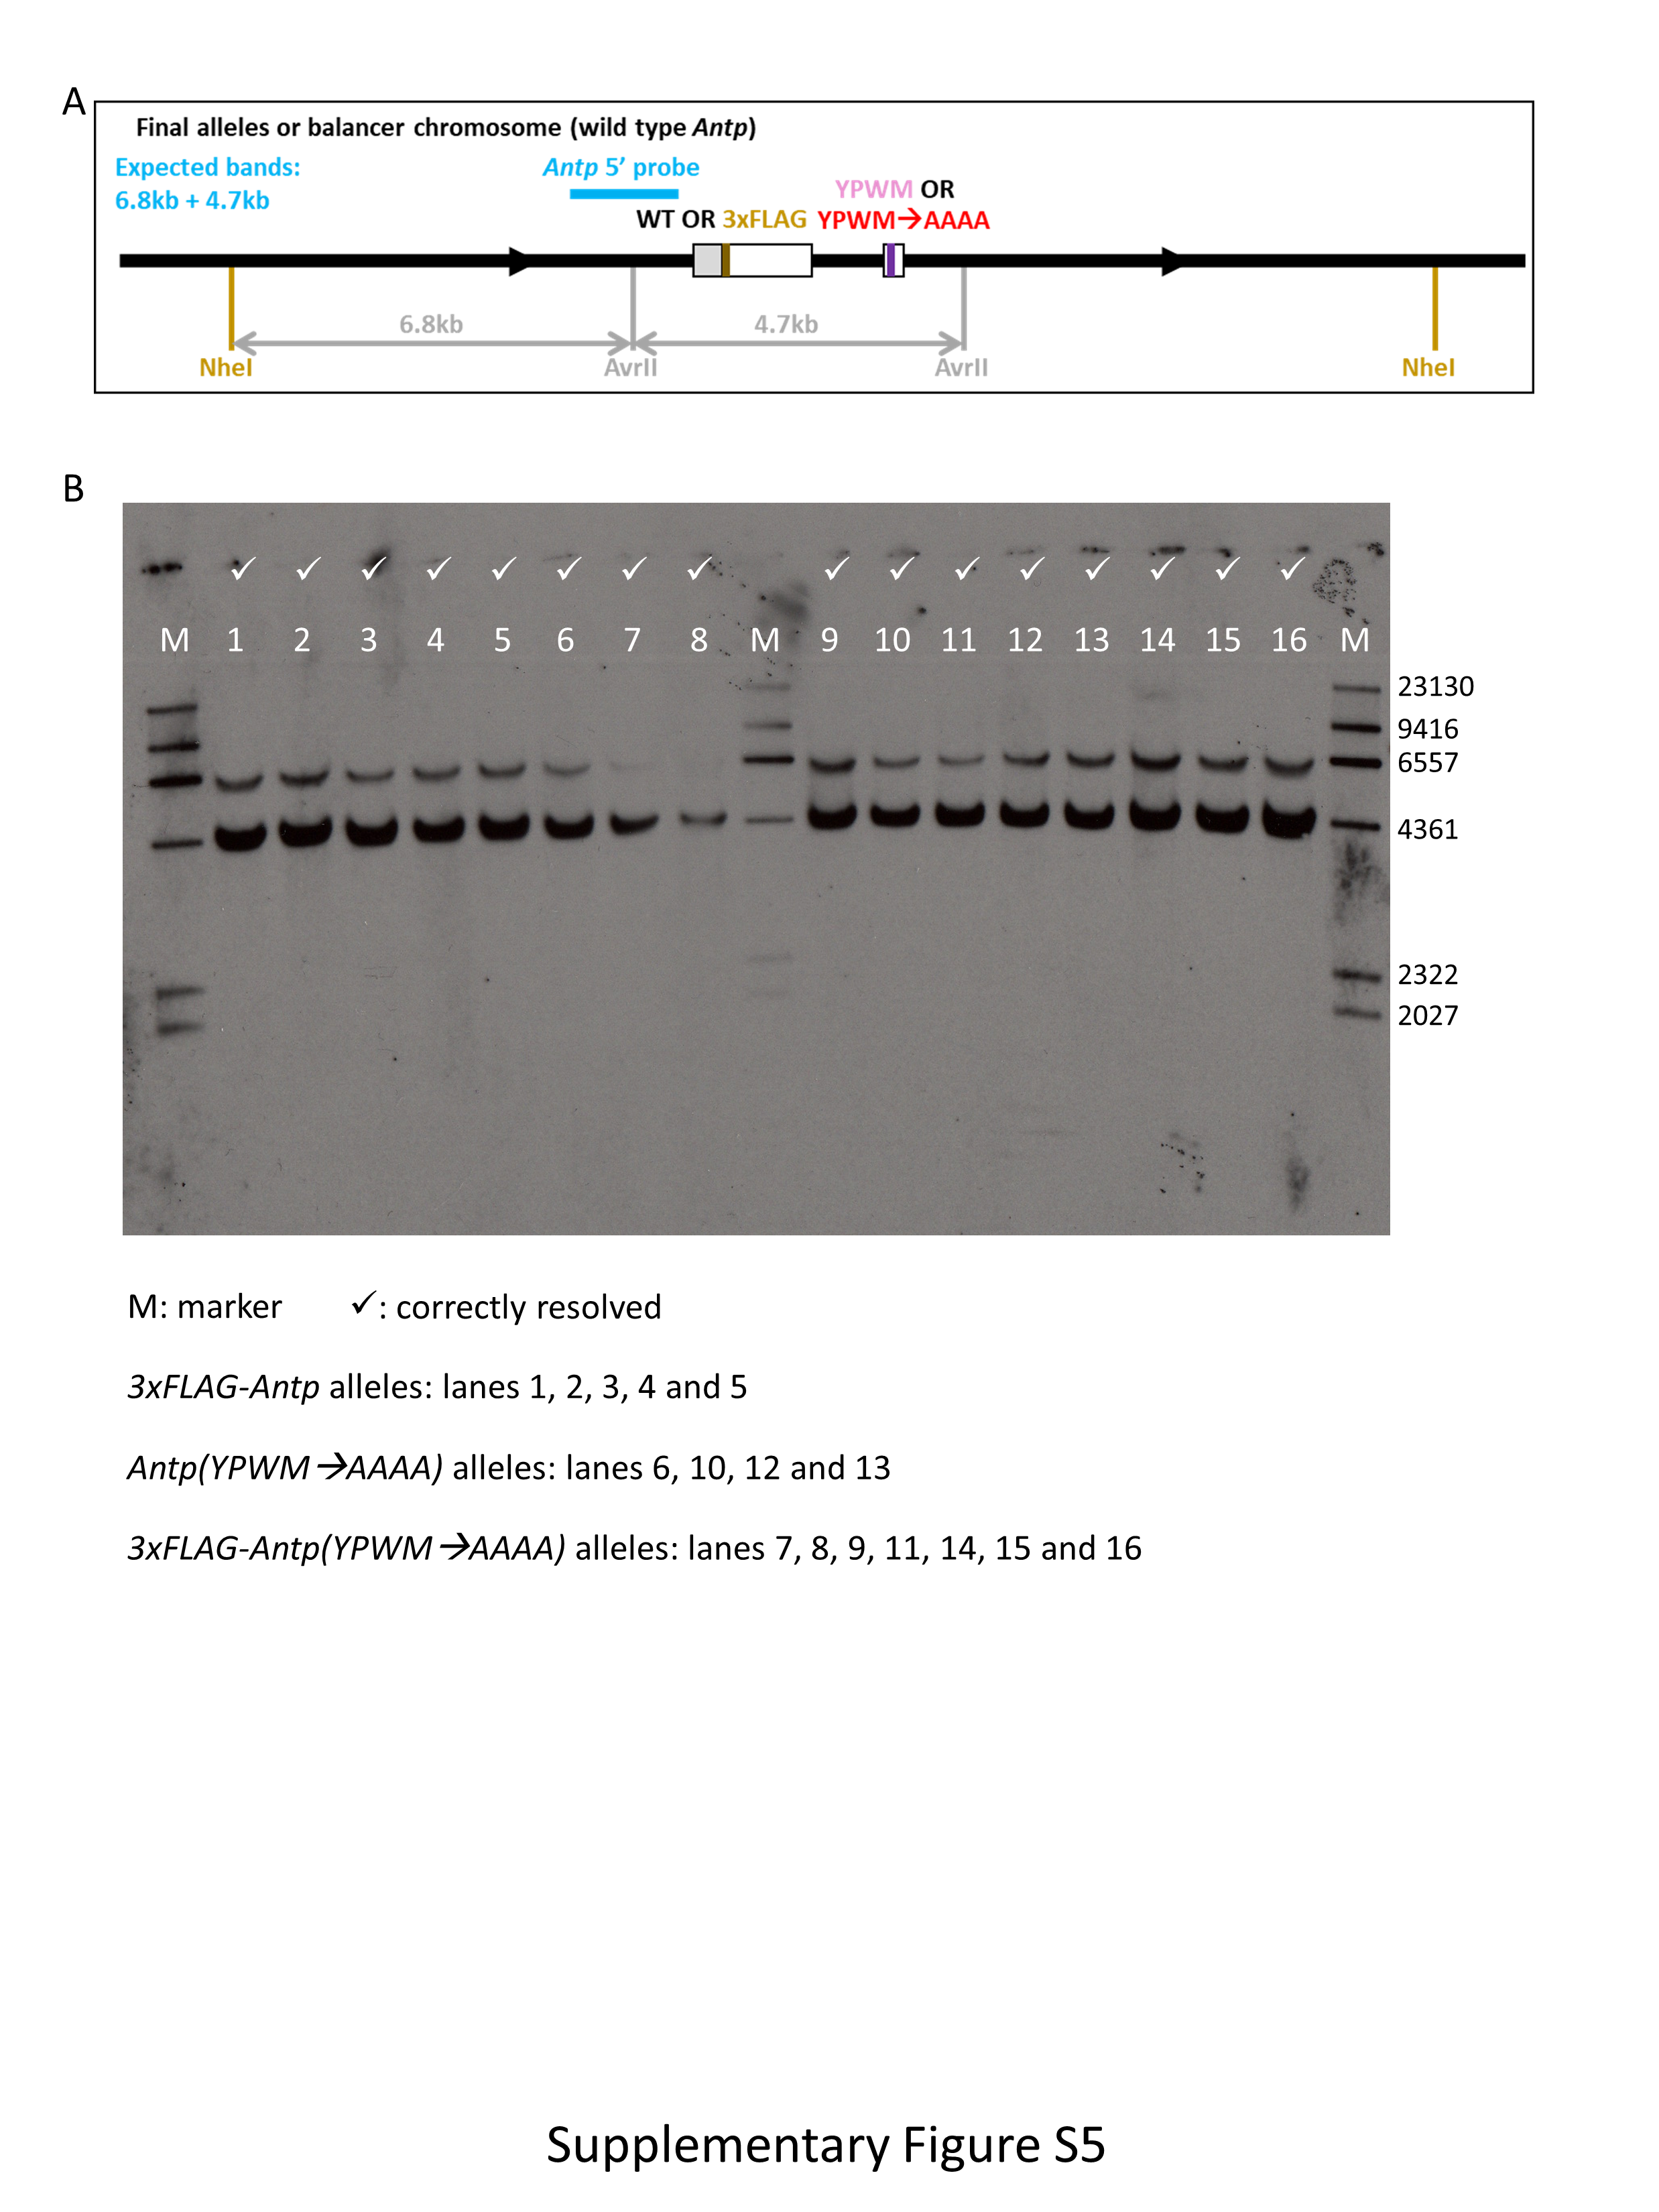


**Supplementary Figure S5. Southern blot verification of final *Antp* alleles from sequential resolution.**

**A.** Restriction map of the correct final *Antp* alleles. The positions of the relevant restriction sites are indicated, as well as the lengths of relevant restriction fragments. The blue bar shows the region used as the *Antp* 5’ Southern blot probe. The expected Southern blot pattern is also indicated. This schematic is not drawn to scale.

**B.** Southern blot results for 16 selected final alleles. The genotype of each alleles is shown below the blot and all alleles are balanced or are segregating a balancer chromosome. All alleles on this blot show the expected pattern. Lanes 7 and 8 both had the correct patterns; the weak large molecular weight bands were confirmed by prolonged exposure (not shown).


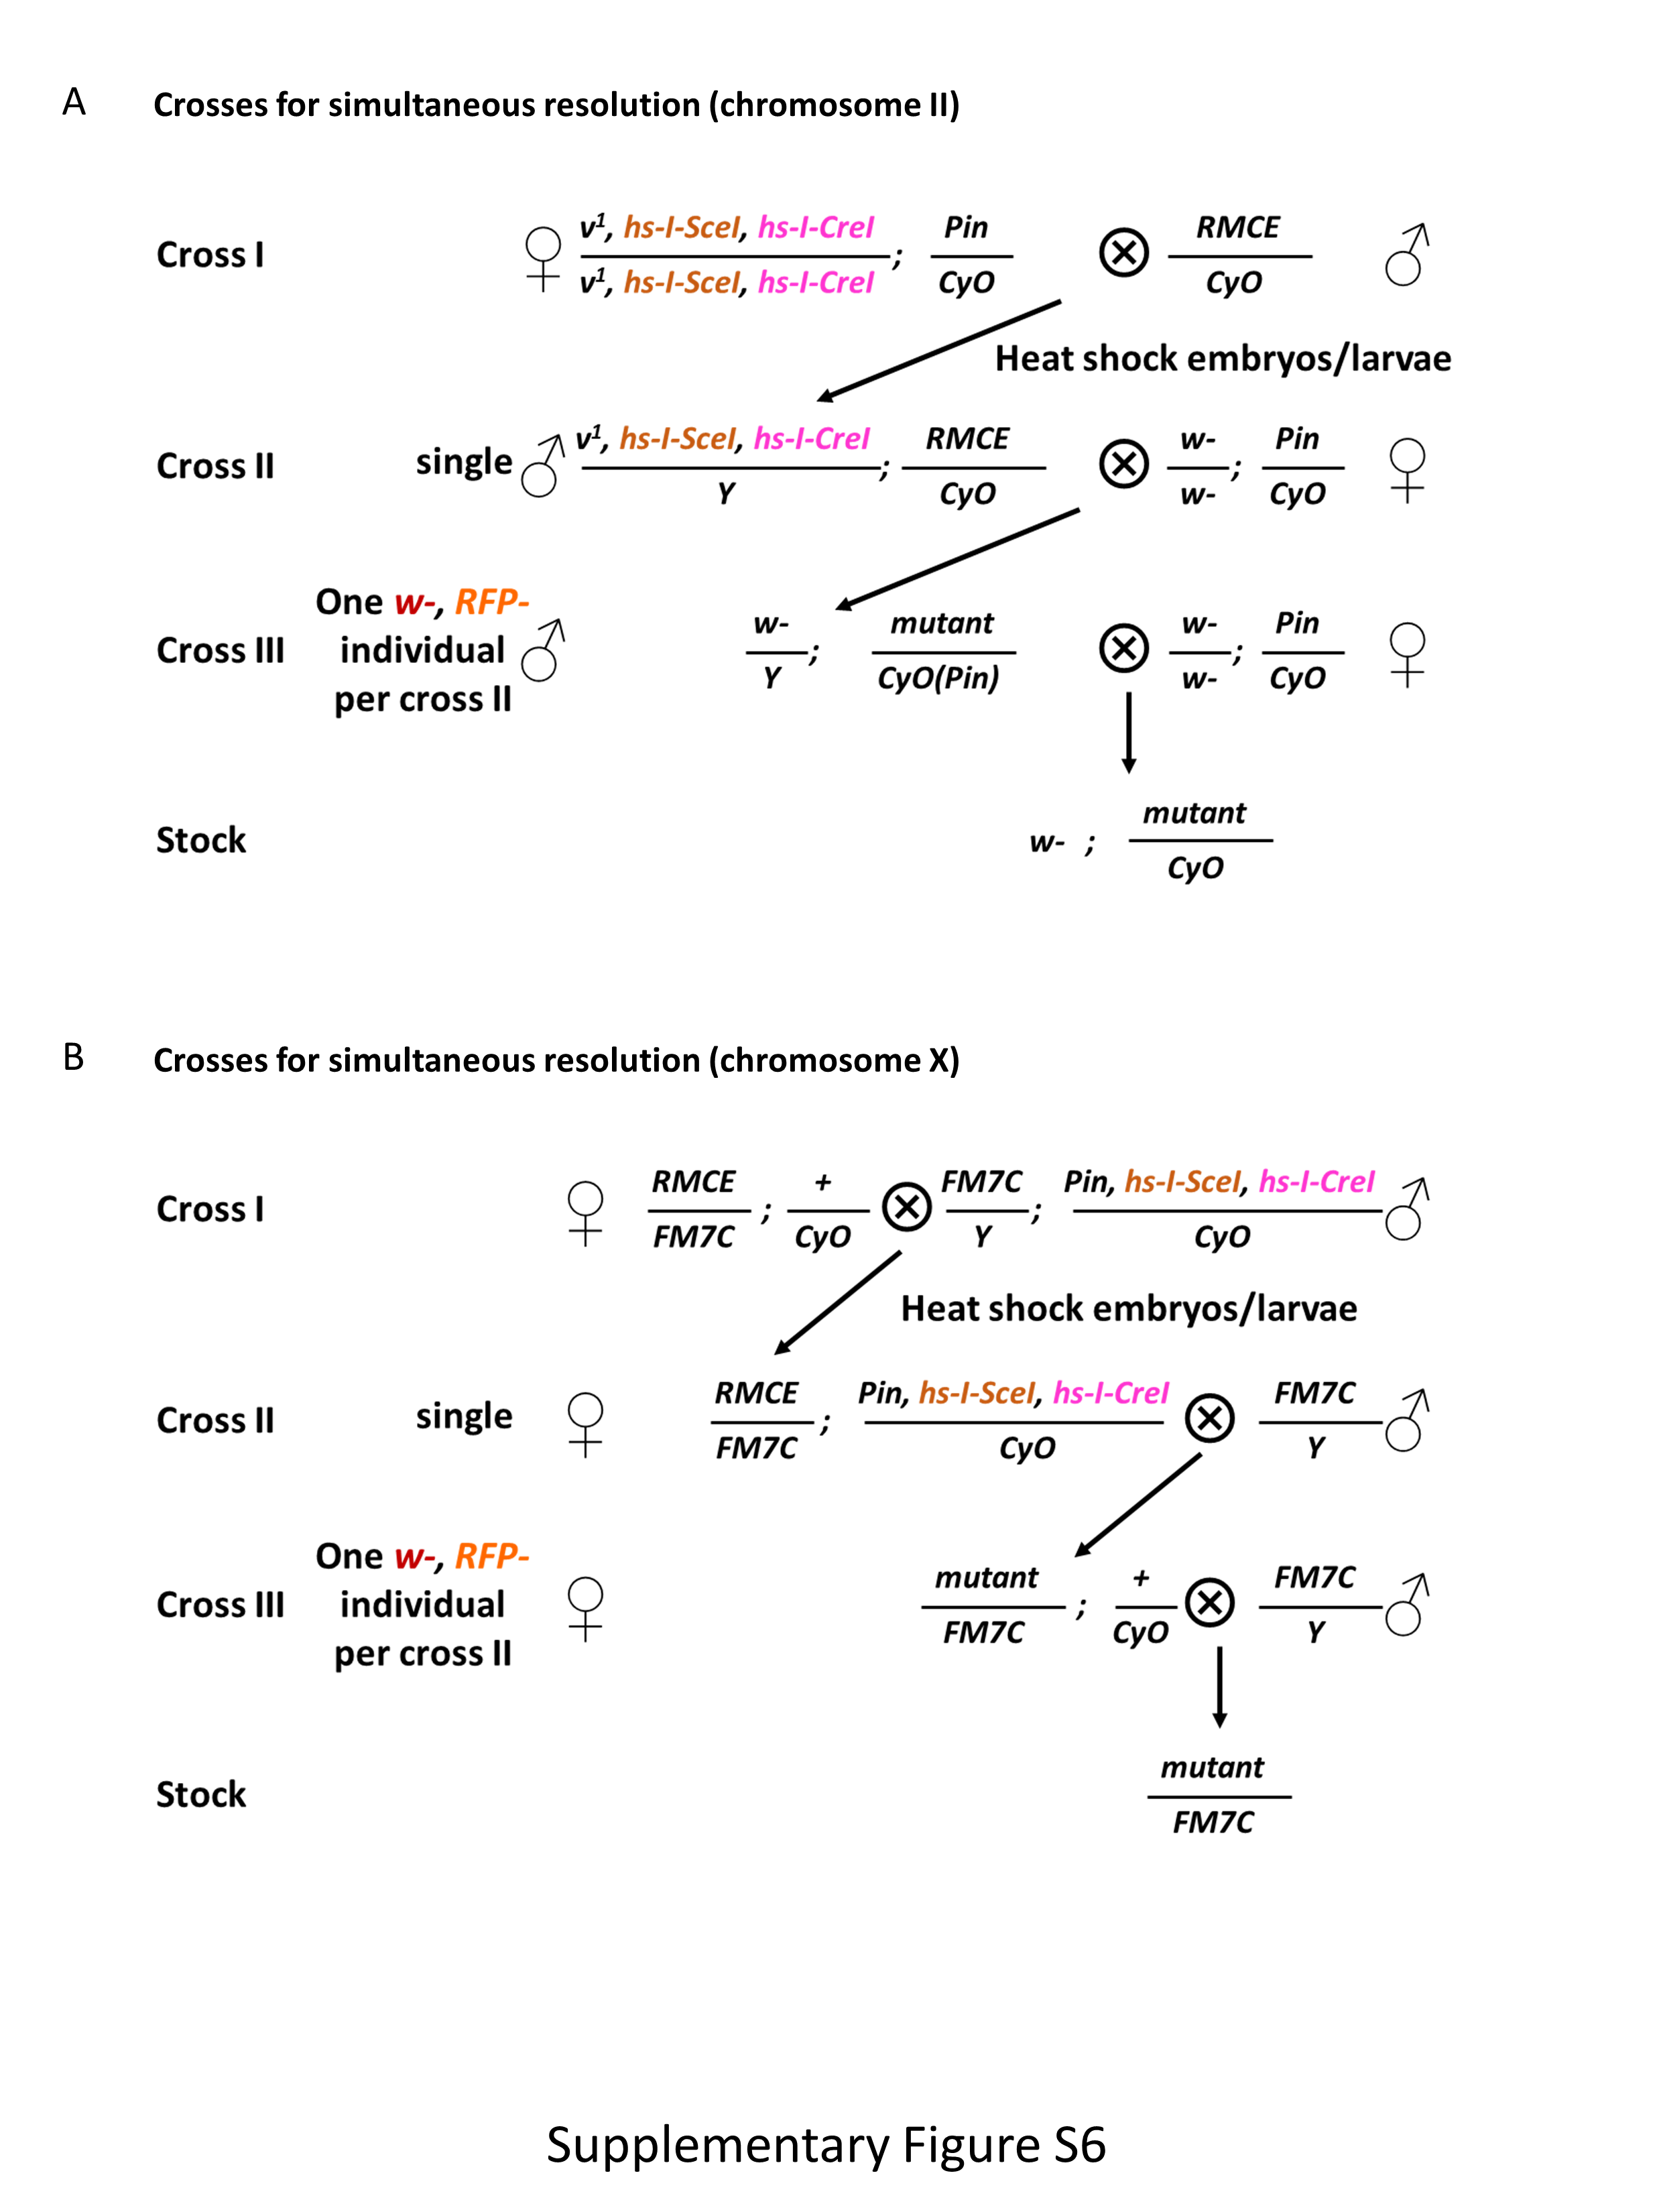


**Supplementary Figure S6. Crosses for the simultaneous resolution of second and X chromosome RMCE alleles.**

**A.** Crosses for simultaneously resolving RMCE alleles on chromosome II.

**B.** Crosses for the simultaneous resolution of X chromosome RMCE alleles.


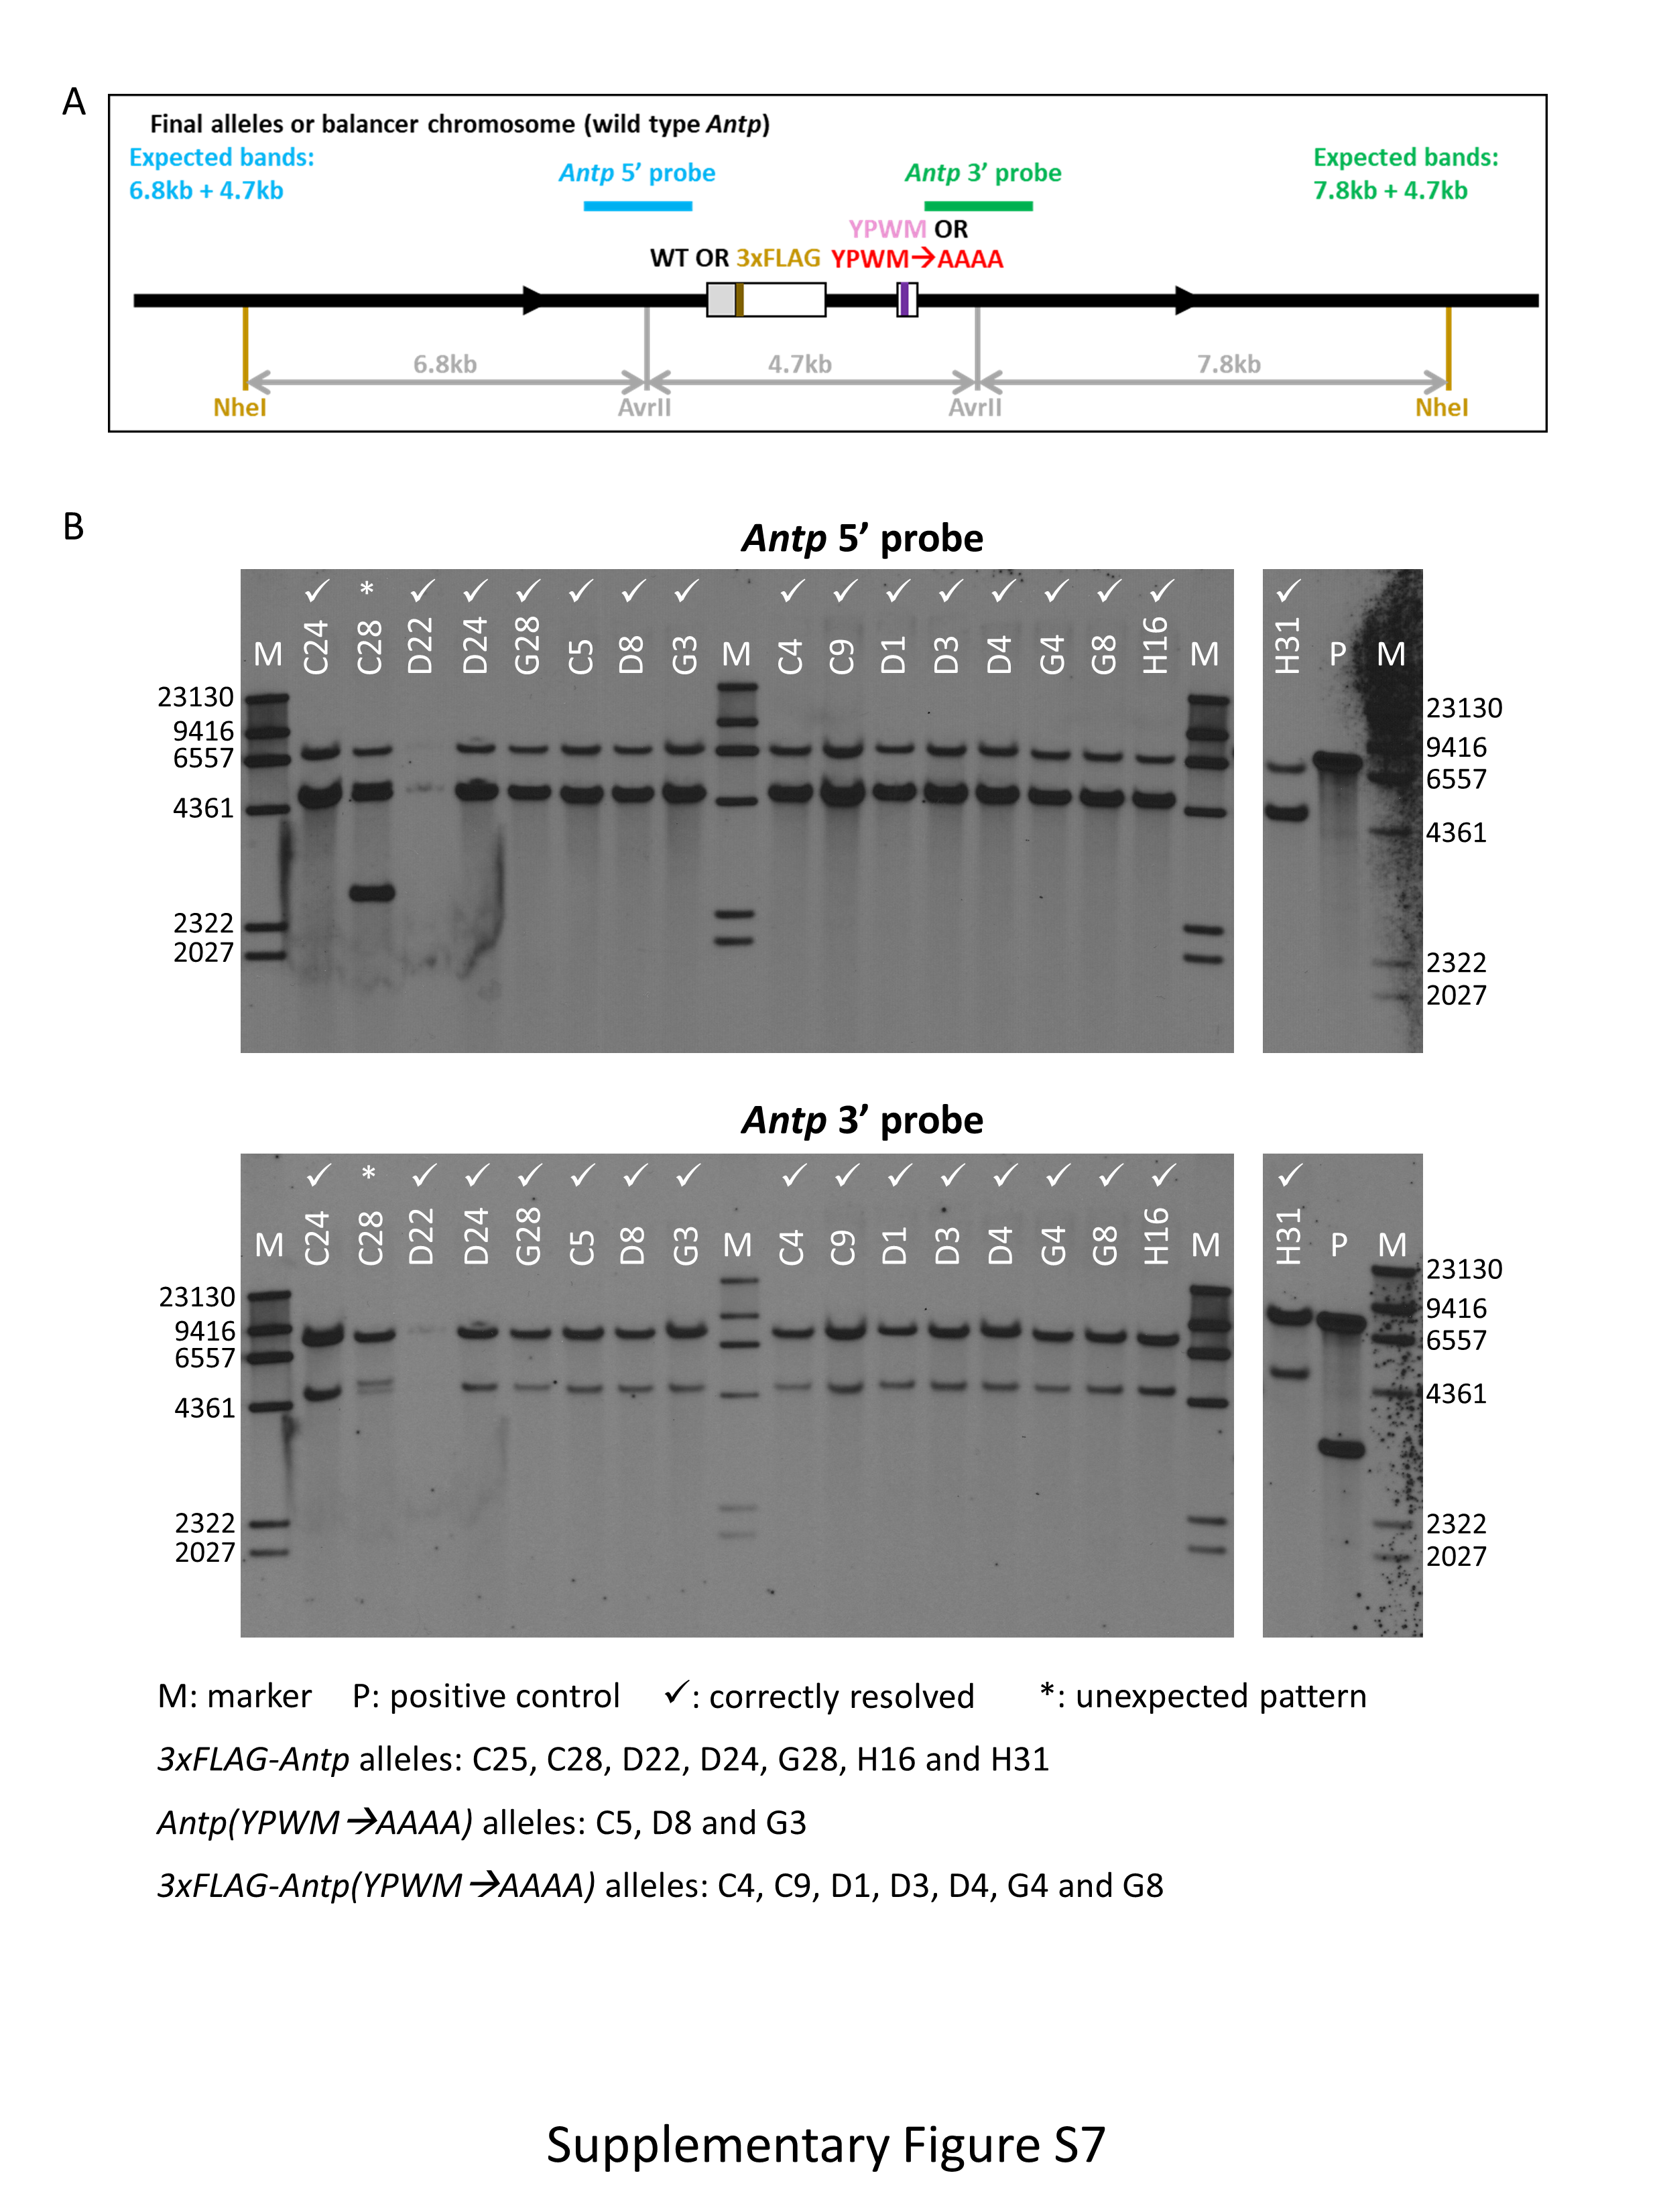


**Supplementary Figure S7. Southern blot verification of final alleles from the simultaneous resolution of *3xFLAG-Antp* RMCE alleles.**

**A.** Restriction map of the correct final alleles. The positions of relevant restriction sites, and the lengths of relevant restriction fragments are shown. The blue and green bars indicate the regions used as *Antp* 5’ and *Antp* 3’ Southern blot probes. The expected Southern blot patterns from each probe are also shown. This schematic is not drawn to scale.

**B.** Southern blot results of selected final alleles. The genotype of each allele is shown below the blots, and all alleles are balanced with or are segregating a balancer chromosome. The letter in the name of a final allele indicates the original RMCE line from which this allele was derived. Other than C28, all alleles show the correct pattern. D22 had weak signal, but its correct pattern was confirmed by prolonged exposure (not shown). The positive control is restriction digested plasmid with a fragment from *Antp*.


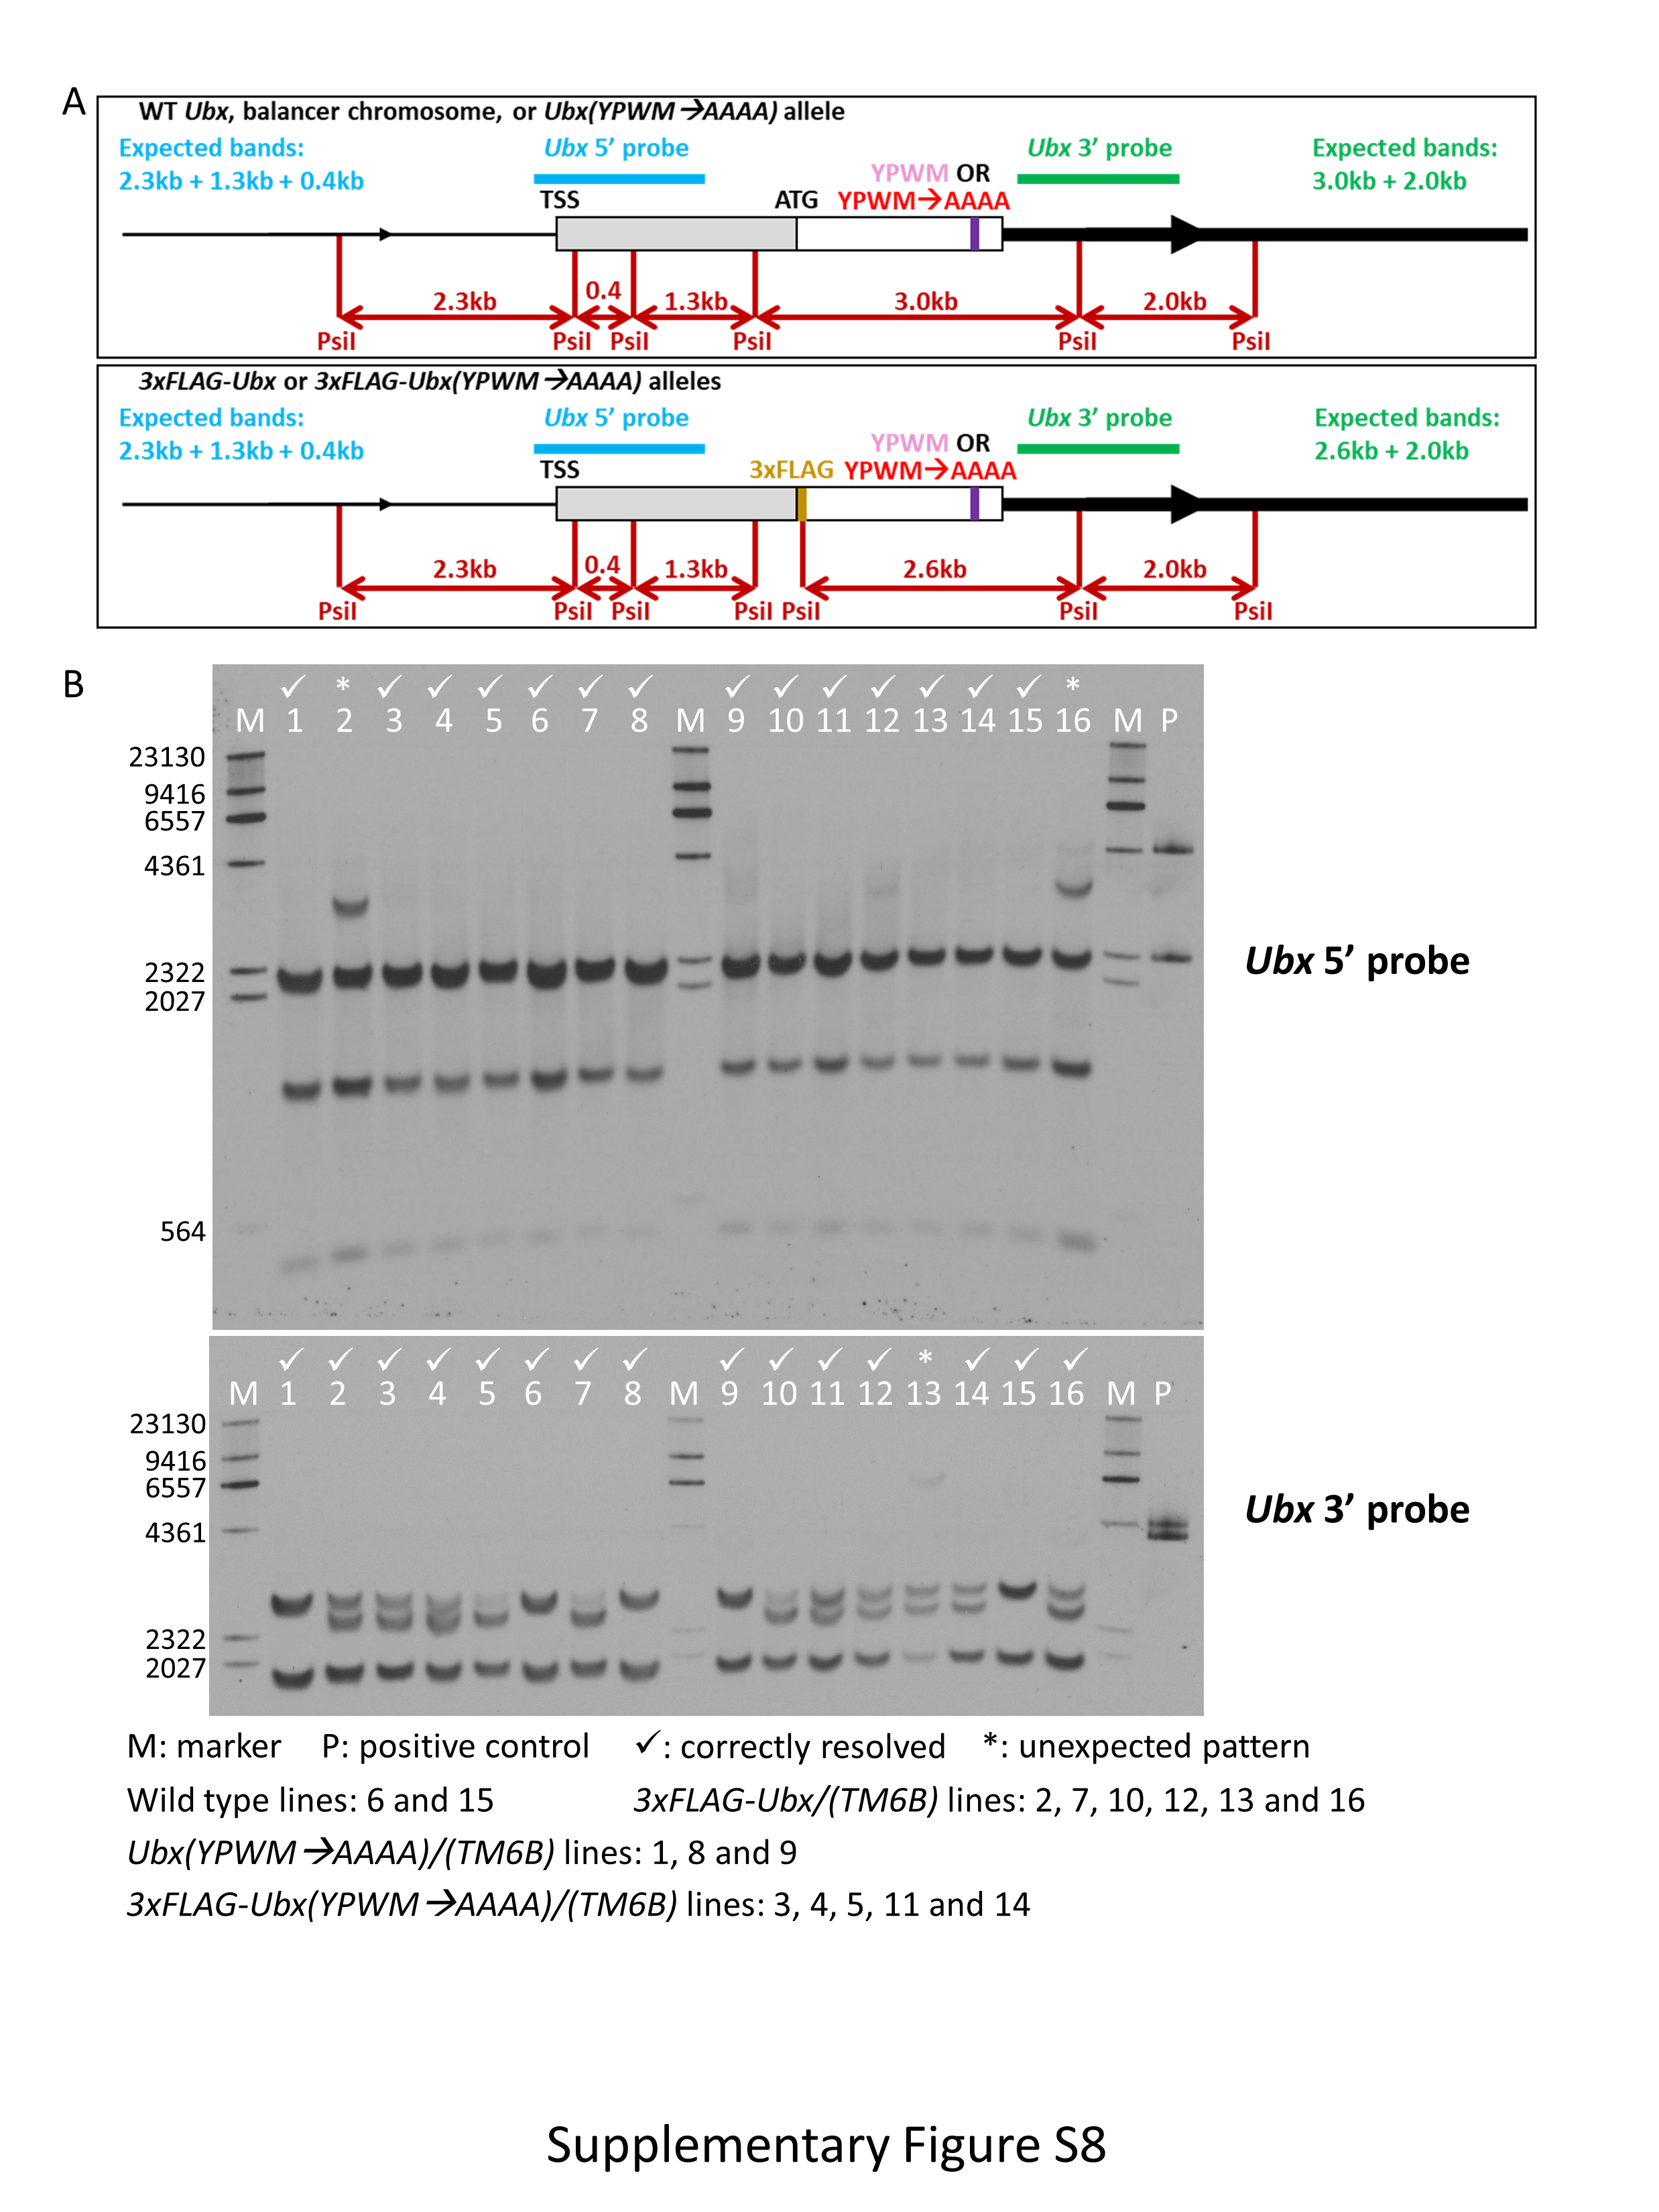


**Supplementary Figure S8. Southern blot verification of selected final *Ubx* alleles.**

**A.** Restriction maps of final *Ubx* alleles. The positions of relevant restriction sites are shown, as well as the sizes of the relevant restriction fragments. The blue and green bars indicate regions used as the *Ubx* 5’ and *Ubx* 3’ probes. The expected Southern blot patterns for each probe are shown. The schematics are not drawn to scale.

**B.** Southern blot results of selected final *Ubx* alleles. The genotype of each sample is shown below the blots. All lines might be segregating a balancer chromosome. Lanes 2, 13 and 16 each showed an extra band, indicating additional rearrangement(s). The positive control is restriction digested plasmid with a fragment from *Ubx*.


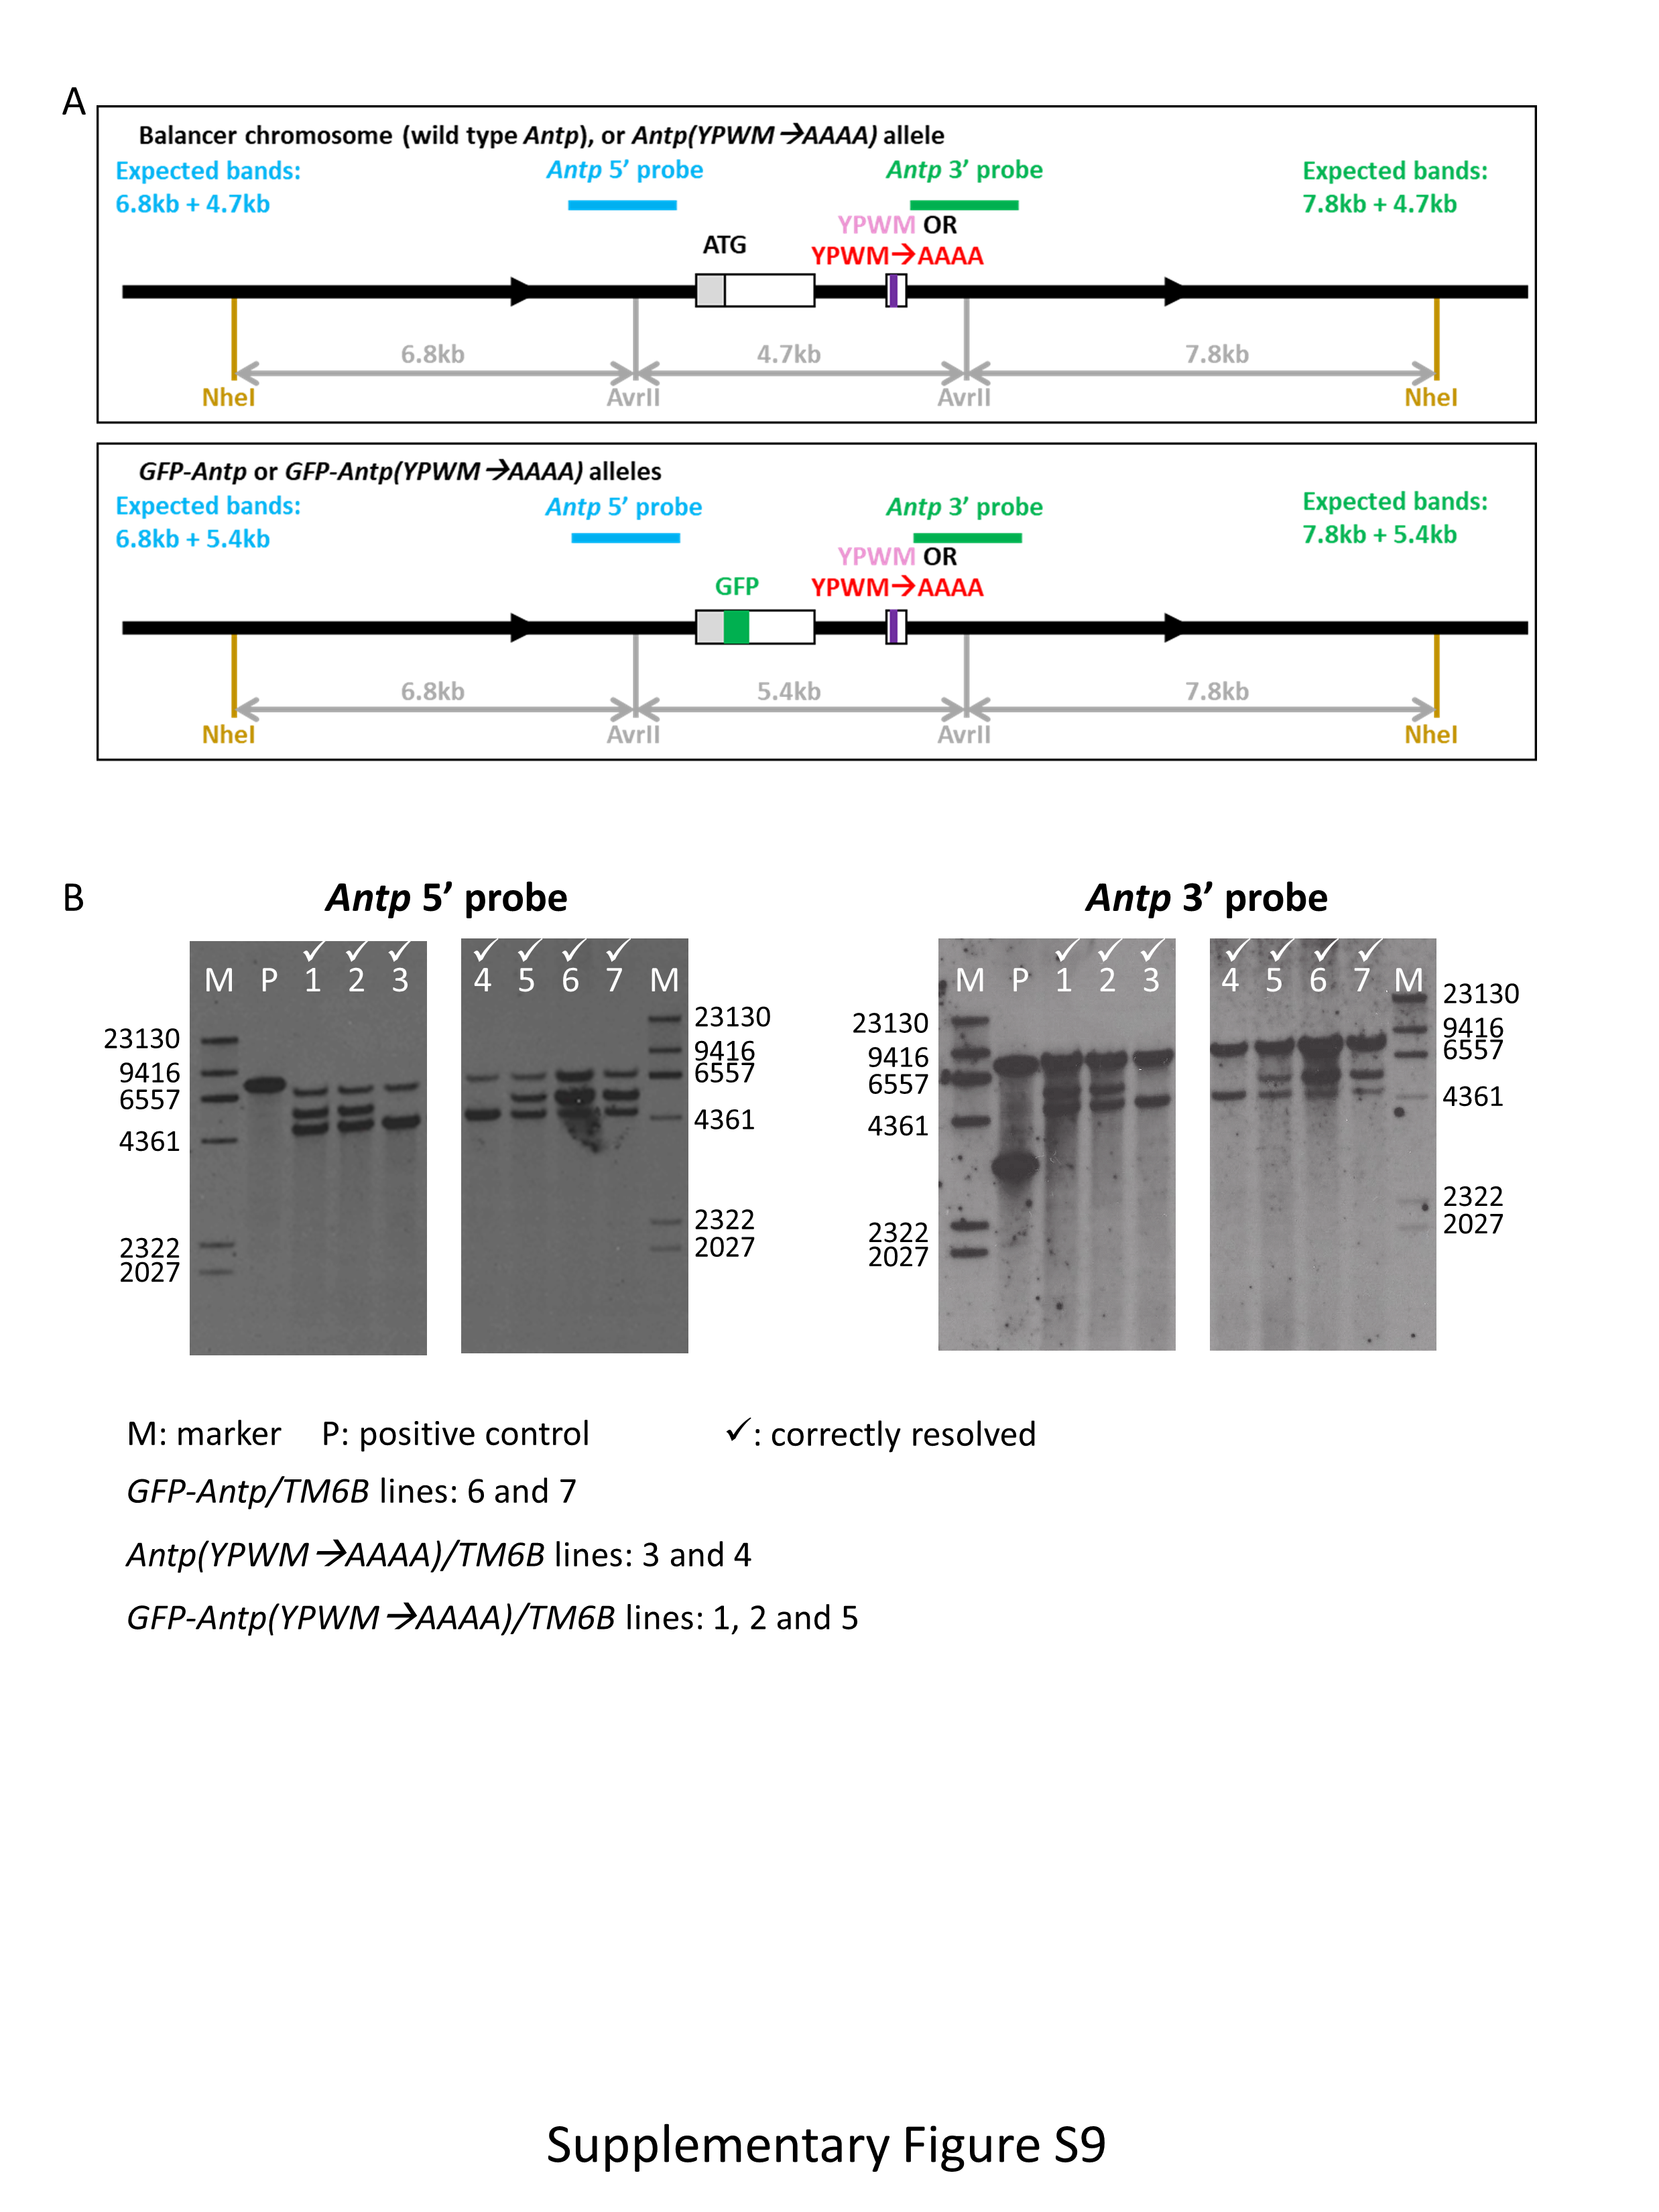


**Supplementary Figure S9. Southern blot verification of selected *GFP-Antp* targeting final alleles.**

**A.** Restriction maps of various genotypes. The positions of the relevant restriction sites are indicated, and the lengths of the relevant restriction fragments are also shown. The blue and green bars show the regions used as *Antp* 5’ and *Antp* 3’ Southern blot probes. The expected patterns from each probe are indicated. These schematics are not drawn to scale.

**B.** Southern blot results of selected final *GFP-Antp* targeting alleles. The genotype of each sample is indicated below the blots. All of these alleles give correct patterns. The positive control is restriction digested plasmid with a fragment from *Antp*.


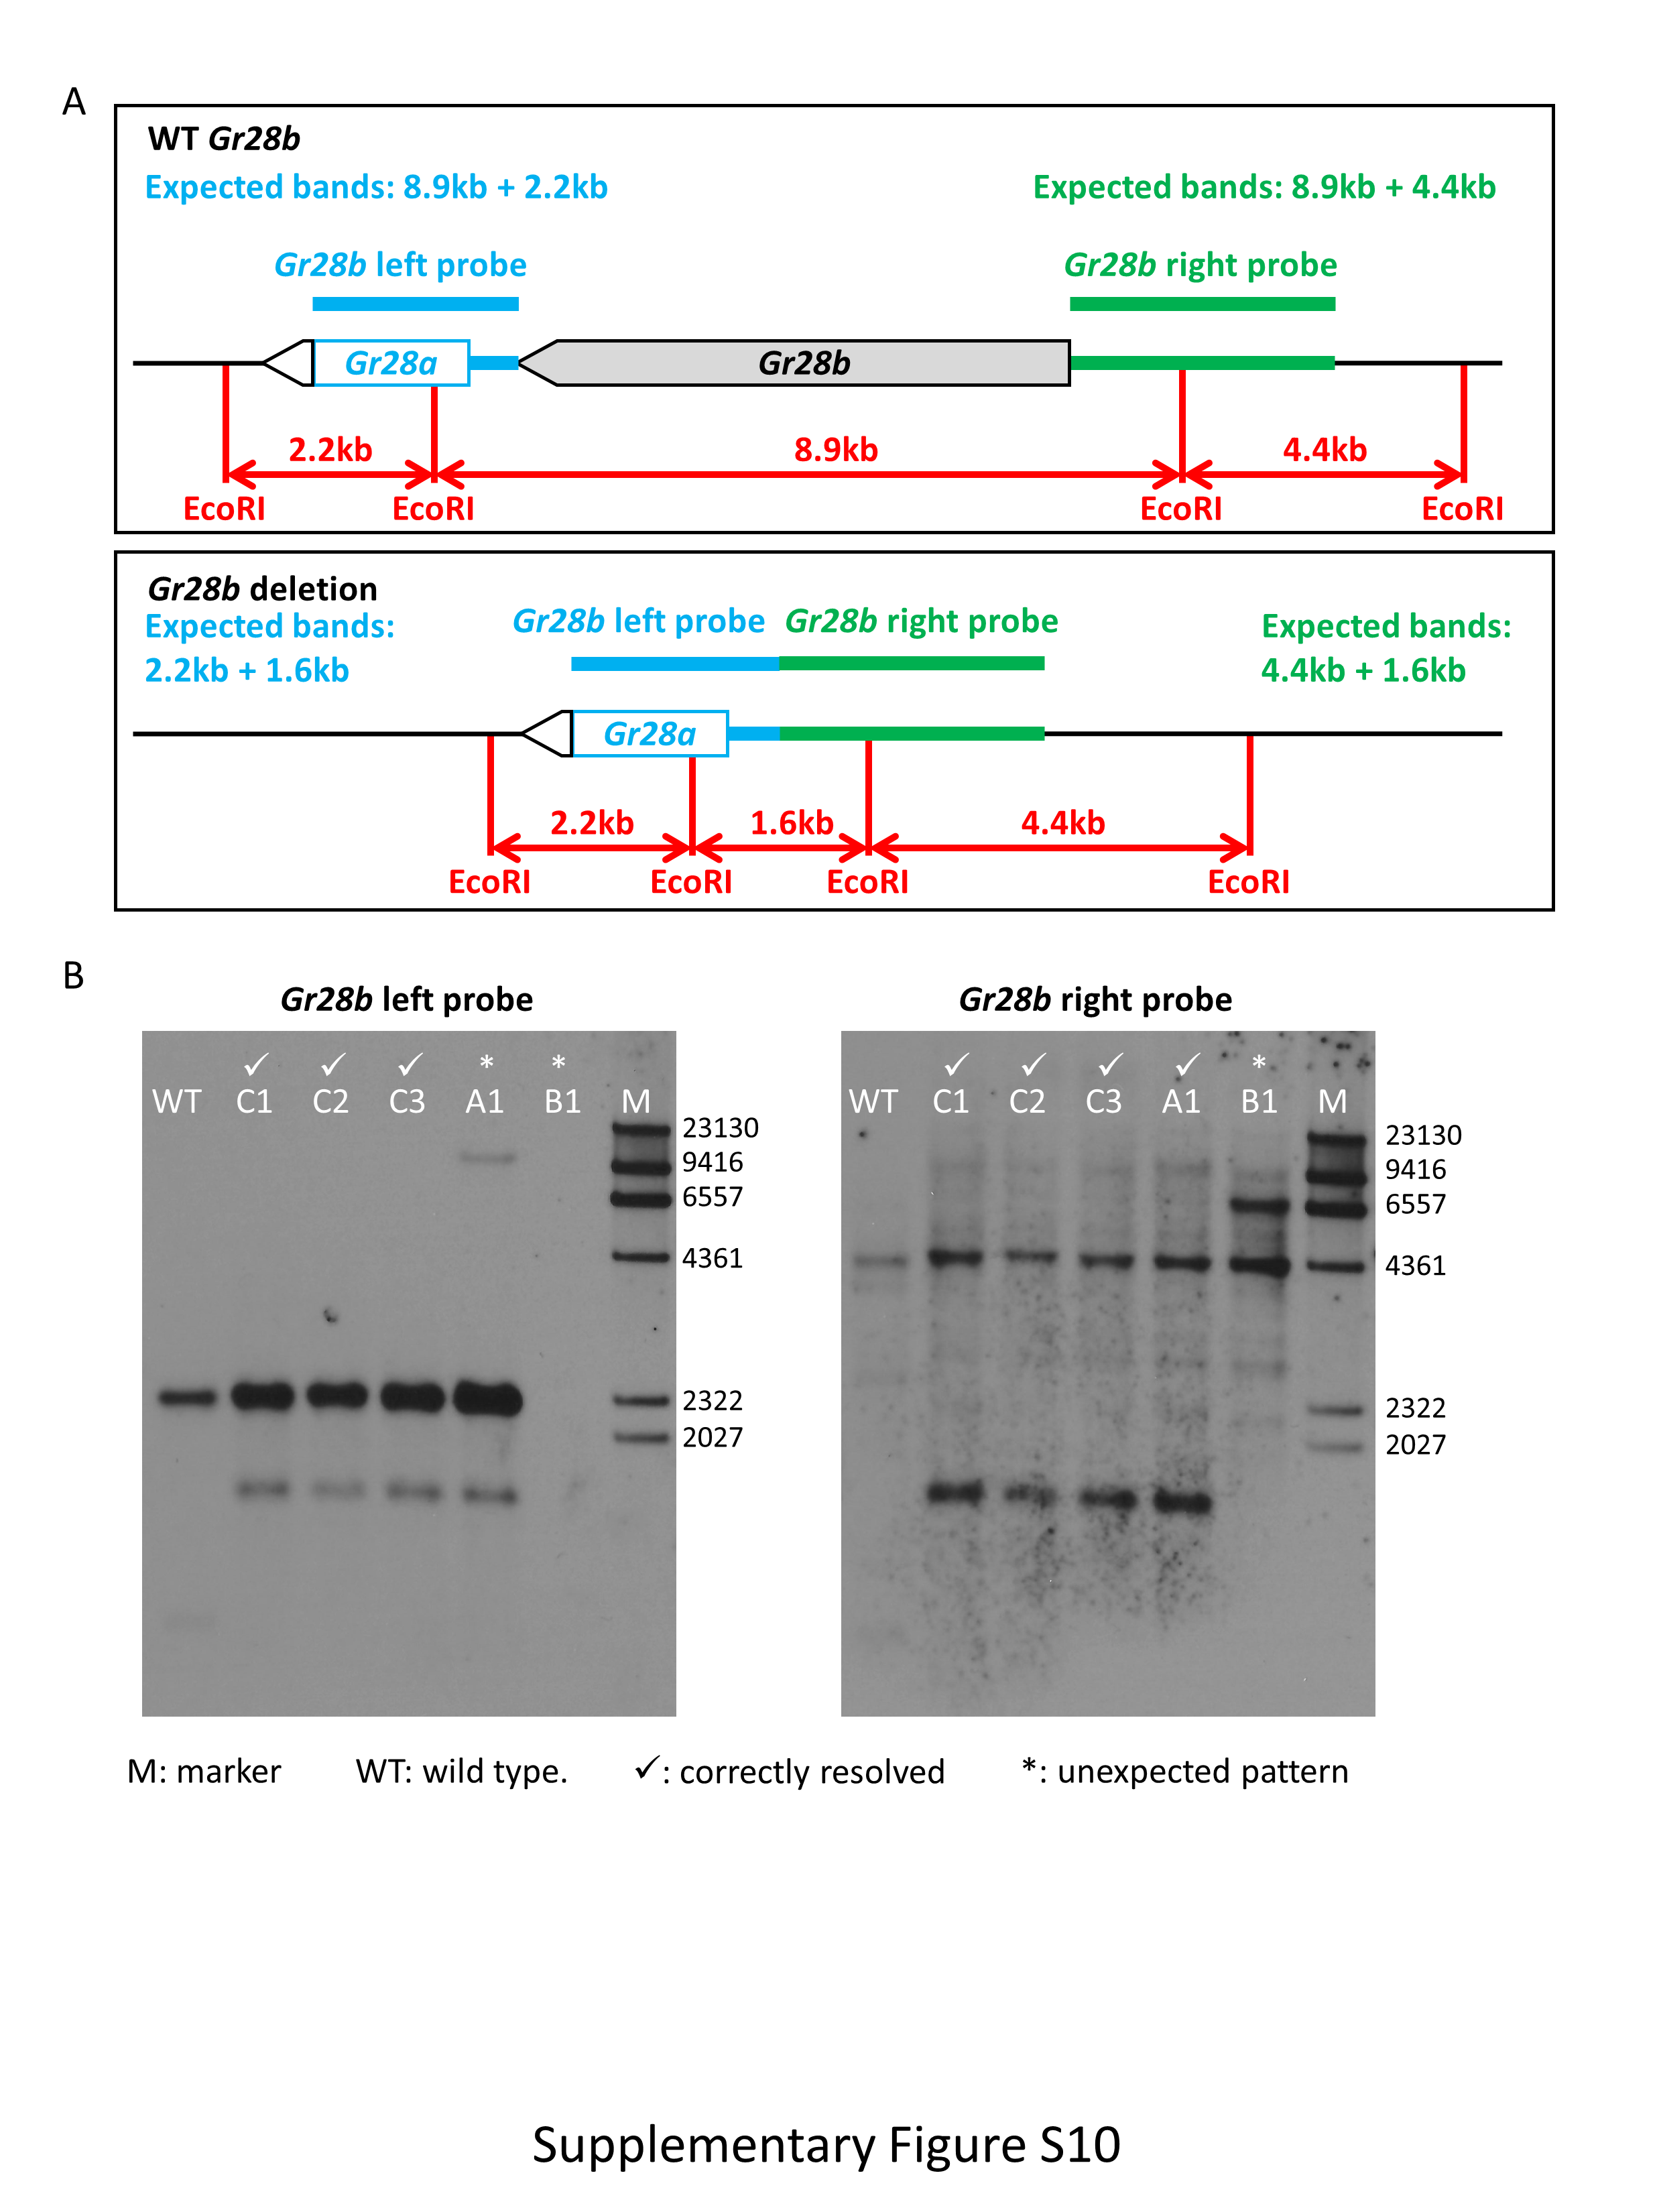


**Supplementary Figure S10. Southern blot verification of selected *Gr28b* deletion alleles.**

**A.** Restriction maps of the wild type *Gr28b* allele and the *Gr28b* deletion allele. The positions of relevant restriction sites, as well as the lengths of relevant restriction fragments, are shown. The blue and green bars indicate the regions used as the *Gr28b* left and *Gr28b* right Southern blot probes. The expected patterns from each probe are also shown. Not drawn to scale.

**B.** Southern blot results of 5 selected final *Gr28b* deletion alleles. Genomic DNA was extracted from homozygous flies for all samples. For the wild type control, the 8.9 kb band is probably too weak to be visible. Alleles C1, C2 and C3 are correct. Allele A1 has an extra band when probed with the *Gr28b* left probe. Allele B1 does not show any signal when probed with the *Gr28b* left probe, indicating sequences homologous to this probe are absent. The additional weak bands visible in the blot probed with *Gr28b* right probe may be due to repetitive sequences in the probe.
